# Supplementary material
Source: publisher site journal article supplement (https://www.degruyterbrill.com/publication/journal_key/ZGRE/downloadAsset/ZGRE_Jahresregister_ZGR%202025.pdf)
Supplement: Supplementary file 1 [file ZGRE_Jahresregister_ZGR%202025.pdf]

# **ZEITSCHRIFT FÜR UNTERNEHMENS- UND GESELLSCHAFTSRECHT**

**HERAUSGEGEBEN von von Alfred Bergmann, Manfred Born, Ingo Drescher, Holger Fleischer, Stephan Harbarth, Jens Koch, Hanno Merkt, Dörte Poelzig, Christoph Teichmann, Jochen Vetter, Marc-Philippe Weller, Hartmut Wicke**

## **ZEITSCHRIFT FÜR UNTERNEHMENS- UND GESELLSCHAFTSRECHT PEER REVIEWED JOURNAL**

BEGRÜNDET VON MARCUS LUTTER UND HERBERT WIEDEMANN

### **HERAUSGEBER**

Vorsitzender Richter am Bundesgerichtshof a.D. Professor Dr. Alfred Bergmann, Karlsruhe;  
Vorsitzender Richter am Bundesgerichtshof Manfred Born, Karlsruhe;  
Vorsitzender Richter am Bundesgerichtshof a.D. Professor Dr. Ingo Drescher, Karlsruhe;  
Professor Dr. Dr. h.c. Holger Fleischer, LL.M. (geschäftsführend), MPI Hamburg;  
Präsident des Bundesverfassungsgerichts Professor Dr. Stephan Harbarth, LL.M., Karlsruhe;  
Professor Dr. Jens Koch, Universität Köln;  
Professor Dr. Hanno Merkt, LL.M. (geschäftsführend), Universität Freiburg, vormals Richter am OLG Karlsruhe;  
Professorin Dr. Dörte Poelzig, M.Jur., Universität Hamburg;  
Professor Dr. Christoph Teichmann, Universität Würzburg;  
Rechtsanwalt Professor Dr. Jochen Vetter, München;  
Professor Dr. Marc-Philippe Weller (geschäftsführend), Universität Heidelberg;  
Notar Professor Dr. Hartmut Wicke, LL.M., München

### **EHEMALIGE HERAUSGEBER, DERER TÄTIGKEIT SICH DIE AKTIVEN HERAUSGEBER IN**

**DANKBARKEIT ERINNERN** Rechtsanwalt und Notar Dr. Carl Hans Barz; Präsident des BGH Dr. Robert Fischer;  
Rechtsanwalt und Wirtschaftsprüfer Dr. Dr. h.c. Reinhard Goerdeler; Vorsitzender Richter am Bundesgerichtshof a.D. Professor Dr. Wulf Goette; Professor Dr. Dr. h.c. mult. Peter Hommelhoff; Professor Dr. Dr. Dr. h.c. mult. Klaus J. Hopt; Rechtsanwalt Professor Dr. Gerd Krieger, Düsseldorf; Professor Dr. Dr. h.c. mult. Marcus Lutter; Präsident des BGH Professor Dr. Walter Odersky; Notar Professor Dr. Hans-Joachim Priester; Professor Dr. Herbert Wiedemann

**VERANTWORTLICHER HERAUSGEBER UND SCHRIFTFLEITER** Professor Dr. Hanno Merkt, Institut für ausländisches und internationales Privatrecht, Abt. II, Albert-Ludwigs-Universität Freiburg, Platz der Universität 3, D-79085 Freiburg, E-Mail: Hanno.Merkt@jura.uni-freiburg.de

**VERLAG** Walter de Gruyter GmbH, Berlin/Boston, Genthiner Straße 13, 10785 Berlin, Germany

**JOURNAL COORDINATOR** Jana Kuchta, De Gruyter, Genthiner Straße 13, 10785 Berlin, Germany, Tel.: +49 (0)30 260 05-228, Fax: +49 (0)30 260 05-250, E-Mail: jana.kuchta@degruyterbrill.com

Die Zeitschrift und alle in ihr enthaltenen einzelnen Beiträge und Abbildungen sind urheberrechtlich geschützt. Das gilt auch für die veröffentlichten Leitsätze, denn diese sind geschützt, soweit sie vom Einsender oder von der Schriftleitung erarbeitet oder redigiert worden sind. Jede Verwertung außerhalb der engen Grenzen des Urheberrechtsgesetzes ist ohne Zustimmung des Verlages unzulässig und strafbar. Das gilt insbesondere für Vervielfältigungen, Übersetzungen, Mikroverfilmungen und die Einspeicherung und Verarbeitung in elektronischen Systemen. Fotokopien für den persönlichen und sonstigen eigenen Gebrauch dürfen nur von einzelnen Beiträgen oder Teilen daraus als Einzelkopien hergestellt werden. Jede im Bereich eines gewerblichen Unternehmens hergestellte oder benutzte Kopie dient gewerblichen Zwecken gem. § 54 (2) UrhG und verpflichtet zur Gebührenzahlung an die VG WORT, Abteilung Wissenschaft, Goethestraße 49, D-80336 München, von der die einzelnen Zahlungsmodalitäten zu erfragen sind.

ISSN 0340-2479 · e-ISSN 1612-7048

Alle Informationen zur Zeitschrift, wie Hinweise für Autoren, Open Access, Bezugsbedingungen und Bestellformulare, sind online zu finden unter [www.degruyterbrill.com/zgr](http://www.degruyterbrill.com/zgr)

© 2025 Walter de Gruyter GmbH, Berlin/Boston, Germany

**SATZ** jürgen ullrich typesatz, Nördlingen

**DRUCK** Franz X. Stückle Druck und Verlag e.K., Ettenheim

Fragen zur allgemeinen Produktsicherheit:  
[productsafety@degruyterbrill.com](mailto:productsafety@degruyterbrill.com)

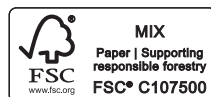

# Inhaltsverzeichnis

|                                                                                                                                                                                                                                                                                                                              |     |
|------------------------------------------------------------------------------------------------------------------------------------------------------------------------------------------------------------------------------------------------------------------------------------------------------------------------------|-----|
| BENDER, PHILIPP MAXIMILIAN: Startup-Förderung zwischen Gesellschaftsrecht, Schuldrecht und Privatautonomie Überlegungen anlässlich der Unternehmenswert-Beteiligung der österreichischen FlexKapG . . .                                                                                                                      | 286 |
| BENZ, NINA: Nach dem Spiel ist vor dem Spiel? Höchststrichterliche Wegweiser im Dickicht von Satzungsdurchbrechungen, Stimmbindungsvereinbarungen und Profifußball – Zugleich Besprechung von BGH II ZR 71/23 . . . . .                                                                                                      | 322 |
| BÖBEL, MORITZ/WELLER, MARC-PHILIPPE/MÜLLER, LAURA: Corporate Political Engagement – Politische Äußerungen und Extremismus im Gesellschaftsrecht . . . . .                                                                                                                                                                    | 553 |
| CASPER, MATTHIAS/MÖSLEIN, FLORIAN: Künstliche Intelligenz in der Aktiengesellschaft . . . . .                                                                                                                                                                                                                                | 870 |
| LE DANDECK, ARNE/GOTSCHKE, HEIKO: Plädoyer für einen übernahmerechtlichen Beherrschungs- und/oder Gewinnabführungsvertrag Ein Regelungsvorschlag zur Stärkung des deutschen Kapitalmarkts und zur Eindämmung von „back-end“ Spekulationen . . . . .                                                                          | 248 |
| FRITZ, DENNIS: Aktienrechtliches Risikomanagement zwischen Unternehmens- und Wirkungszentrierung – Exemplifikation anhand von nachhaltigkeitsbezogenen Risiken und Auswirkungen . . . . .                                                                                                                                    | 760 |
| GEBHARD, BERO: Zwischendividenden im deutschen und internationalen Aktienrecht . . . . .                                                                                                                                                                                                                                     | 978 |
| GOTSCHKE, HEIKO/LE DANDECK, ARNE: Plädoyer für einen übernahmerechtlichen Beherrschungs- und/oder Gewinnabführungsvertrag Ein Regelungsvorschlag zur Stärkung des deutschen Kapitalmarkts und zur Eindämmung von „back-end“ Spekulationen . . . . .                                                                          | 248 |
| HAACKE, ELIAS: Die Mitgliedschaft des sanktionierten Anteilseigners . . .                                                                                                                                                                                                                                                    | 70  |
| HENTZEN, MATTHIAS: Insiderhandel oder die Grenzen ökonomischer Anreize im Recht . . . . .                                                                                                                                                                                                                                    | 745 |
| HERNDL, LUKAS: Die Lieferkettenverantwortung des Finanzsektors – eine funktionale Analyse des Aufsichtsrechts und der CSDDD . . . . .                                                                                                                                                                                        | 791 |
| HOLLE, PHILIPP MAXIMILIAN: Neuausrichtung der bürgerlich-rechtlichen Prospekthaftung im weiteren Sinne – Besprechung von BGH, Beschluss vom 27. 6. 2023 – II ZR 57/21, BGH, Beschluss vom 11. 7. 2023 – XI ZB 20/21, BGH, Beschluss vom 25. 7. 2023 – XI ZB 11/21 sowie BGH, Urteil vom 24. 10. 2023 – II ZR 57/21 . . . . . | 1   |
| HOLLE, PHILIPP MAXIMILIAN: Novation, Hin- und Herzahlen, Stundung und Stillhalten im Kontext des § 302 Abs. 3 AktG. . . . .                                                                                                                                                                                                  | 915 |
| HOPT, KLAUS J./ROTH, MARKUS: Aufsichtsratspraxis und Reform des Aufsichtsratsrechts . . . . .                                                                                                                                                                                                                                | 339 |
| HORN, SIMON: Die organschaftliche Mehrfachzurechnung von Handlungen bei Doppelmandaten – Besprechung von BGH, Urt. v. 6. 3. 2025 – III ZR 137/24, BGHZ 242, 371 . . . . .                                                                                                                                                    | 822 |

|                                                                                                                                                                                                         |      |
|---------------------------------------------------------------------------------------------------------------------------------------------------------------------------------------------------------|------|
| FREITAG, ROBERT: Die Rechtsfähigkeit der nicht eingetragenen Personen-<br>gesellschaft nach dem MoPeG – Ansätze zur Korrektur eines ver-<br>fehlten gesetzgeberischen Konzepts . . . . .                | 595  |
| GOETTE, WULF: Ein Leben für das Recht: vielfältig, fordernd, bewe-<br>gend . . . . .                                                                                                                    | 165  |
| KRAFT, JULIA: Das Widerspruchsmodell bei der Verschmelzung unter Be-<br>teiligung einer eGbR . . . . .                                                                                                  | 719  |
| KINDT, TORSTEN: Internationale Emissionskonsortien zwischen europäi-<br>schem Kollisions- und deutschem Personengesellschaftsrecht . . . . .                                                            | 462  |
| KOCH, JENS: Der fehlende Gewinnverwendungsbeschluss im Kapitalge-<br>sellschaftsrecht . . . . .                                                                                                         | 200  |
| LUY, THEO: Status quo und weitere Entwicklung grenzüberschreitender<br>Formwechsel im Europäischen Binnenmarkt . . . . .                                                                                | 418  |
| MARKWORTH, DAVID: Der Vorstand als Zoon politikon – Plädoyer für<br>einen kritischeren Blick auf politische Aussagen von Vorstandsmit-<br>gliedern . . . . .                                            | 622  |
| MOCK, SEBASTIAN: Der fehlerhaft bestellte besondere Vertreter – zu-<br>gleich Besprechung von BGH v. 17. 9. 2024 – II ZR 221/22, BGHZ<br>241, 196 . . . . .                                             | 537  |
| MÖSLEIN, FLORIAN/CASPER, MATTHIAS: Künstliche Intelligenz in der Ak-<br>tiengesellschaft . . . . .                                                                                                      | 870  |
| MÜLLER, LAURA/BÖBEL, MORITZ/WELLER, MARC-PHILIPPE: Corporate Po-<br>litical Engagement – Politische Äußerungen und Extremismus im<br>Gesellschaftsrecht . . . . .                                       | 553  |
| PIERONCZYK, MARC-CHRISTIAN: Die privatautonome Vereinbarung der<br>§§ 110–115 HGB durch GbR und PartG . . . . .                                                                                         | 494  |
| RICHTER, JOHANNES: „Say on Climate“ in der GmbH – Gesellschafterkla-<br>gen bei (nicht-)nachhaltiger Geschäftsführung . . . . .                                                                         | 43   |
| ROTH, MARKUS/HOPT, KLAUS J: Aufsichtsratspraxis und Reform des Auf-<br>sichtsratsrechts . . . . .                                                                                                       | 339  |
| SANDERS, ANNE: Die wirtschaftliche Einheit im Kartellzivilprozessrecht –<br>Zugleich Besprechung von EuGH – C 393/23 – Athenian Brewery<br>SA, Heineken NV gegen Macedonian Thrace Brewery SA . . . . . | 673  |
| SCHOLLMAYER, EBERHARD: Die Zinnen von Schloss Torrescenza – Das<br>Edil-Works-2-Urteil des Europäischen Gerichtshofs vom 25. April<br>2024, Rs. C-276/22 . . . . .                                      | 150  |
| SCHWARZ, LARA: Ungeklärte prozess- und insolvenzrechtliche Fragen des<br>§ 715b BGB . . . . .                                                                                                           | 112  |
| STARK, JOHANNA: Politisches Gesellschaftsrecht? Rechtliche Rahmenbe-<br>dingungen für politische Positionierungen gesellschaftsrechtlicher<br>Organe . . . . .                                          | 686  |
| STARK, JOHANNA: Herabsetzung der Vorstandsvergütung in der Insol-<br>venz – Zugleich Besprechung von BGH, Urteil v. 22.10.2024,<br>II ZR 97/23 . . . . .                                                | 1013 |

WEDEMANN, FRAUKE: No profits für Geschäftsleiter – Zur Pflicht, im Zusammenhang mit der Geschäftsleitung erlangte Vorteile herauszugeben . . . . . 837

WELLER, MARC-PHILIPPE/MILLER, LAURA/BÖBEL, MORITZ: Corporate Political Engagement – Politische Äußerungen und Extremismus im Gesellschaftsrecht . . . . . 553

# Sachregister

## 4. EU-Geldwäsche-Richtlinie (GW-RL) 799

### Actio pro socio

- Gesellschaftsrecht 61

### Aktiengesellschaft

- Anforderungen an die Kontrolle und Organisationspflichten (Corporate Digital Responsibility) bei Verwendung von Künstlicher Intelligenz 891
- Berichts- und Offenlegungspflichten 778
- CEO Activism 628
- Corporate Governance-Mechanismen für unternehmensfremde Zwecke 788
- Delegation auf menschliche Mitarbeiter 875
- Einflussnahmeversuche von Unternehmen auf die Politik 628
- Einsichts- und Auskunftsrechte 85
- Entpolitisierung der AG 665
- Entscheidungen durch natürliche Personen 872
- Etablierung eines Frühwarnsystems gegen bestandsgefährdende Entwicklungen 895
- Institutionalisiertes Risikomanagementsystem 765
- Interessenpluralistischen Zielkonzept 769
- KI als Abstimmungstool einzelner Aktionäre 906
- Künstliche Intelligenz in der Aktiengesellschaft 870
- Maschinelles Entscheiden 875
- Maßnahmen zu der Bestandssicherung nach § 91 Abs. 2 AktG 765
- mit KI generierte Berichte des Vorstands und des Aufsichtsrats einer Aktiengesellschaft 905
- Nachhaltigkeitsaspekte 775
- Nachhaltigkeitsbezogenes Risikomanagementsystem nach dem LkSG 783
- Nachhaltigkeitsbezogenes Risikomanagementsystem nach der CSDDD 782
- Nachhaltigkeitsrisiken für eine Gesellschaft 774
- Prinzipal-Agenten-Konflikt zwischen Vorstand und Anteilseignern 629
- Reputationsrisiken 774
- Risikomanagement 760
- Risikomanagementsystem nach § 91 Abs. 3 und §§ 93 Abs. 1, 76 Abs. 1 AktG 767
- Rückbeziehung auf das Unternehmen durch Reputationsrisiken 770

- Rückbeziehung und sondergesetzliche Überformung am Beispiel der Nachhaltigkeit 772
- Rücksicht auf Gemeinwohlbelange 769
- Say on Political Activism 666
- soft law Verhaltenspflichten für den Einsatz von KI 893
- Sorgfaltspflichten nach der CSDDD 783
- Wichtiger Grund in der Person des Beteiligten als allgemeine Ausschlussvoraussetzung 581

### Aktienrecht

- agency theory 983
- aktienrechtliches Risikomanagement 760
- Ansprüche gegen Aktionäre wegen unrechtmäßiger Dividendenauszahlungen 538
- puzzle 982
- Dividenden ein Ansatz zur Lösung des Free-Cash-Flow-Problems 983
- echte und unechte Zwischendividenden 980
- Einführung in die Ökonomie von Dividenden und Zwischendividenden 981
- Forschungsstand zu Zwischendividenden 980
- Gewinnverteilung nach § 58 Abs. 4 AktG 212
- Gewinnverwendungsbeschluss materielle Rechtslage 204
- Gewinnverwendungsbeschluss Meinungsstand 209
- Gewinnverwendungsbeschluss Pattsituation 212
- Gewinnverwendungsbeschluss Problematische Fallgestaltungen 202
- Gewinnverwendungsbeschluss Rahmenbedingungen 201
- Gewinnverwendungsbeschluss Verzögerungssituation 221, 245
- Herabsetzung der Vorstandsvergütung allgemein 1015
- Herabsetzung der Vorstandsvergütung in der Insolvenz 1013
- homemade dividend 982
- internationalen Rechtsvergleich zur Zwischendividende 993
- Konkretisierung der Billigkeitsabwägung zur Vergütungsherabsetzung 1017
- no profits für Geschäftsleiter 838
- ökonomische Funktionsweise von Dividenden 980

- Verbot der Zwischendividenden 979
- Zwischendividenden im deutschen und internationalen Aktienrecht 978

### **Aktienrechtliches Risikomanagement**

- Berichts- und Offenlegungspflichten 778
- Definition 764
- Differenzierung zwischen unternehmens- und wirkungszentrierten Risikomanagementsystem 786
- fakultative Ausweitung zu einem auch wirkungszentrierten Risikomanagementsystem 771
- Frage nach der unternehmensinternen Organisation 786
- Früherkennungssystem nach § 91 Abs. 2 AktG 770
- Grundsatz der Unternehmenszentrierung 764
- institutionalisiertes Risikomanagementsystem einer Gesellschaft 765
- Konzept der doppelten Wesentlichkeit 761
- maßgebliche Perspektive 762
- Maßnahmen zu der Bestandssicherung nach § 91 Abs. 2 AktG 765
- Nachhaltigkeitsaspekte 775
- Nachhaltigkeitsbezogenes Risikomanagementsystem nach dem LkSG 783
- Nachhaltigkeitsbezogenes Risikomanagementsystem nach der CSDDD 782
- Nachhaltigkeitsrisiken 778
- obligatorische Unternehmens- bei fakultativer Wirkungszentrierung 773
- Outside-in-Perspektive 766
- Perspektiven 785
- Perspektivendualismus 763
- Perspektivendualismus des DCGK 2022 777
- Reputationsrisiken 774
- Risikoerfassung, Risikobewertung und Risikokommunikation als Teilelemente 771
- risikomanagementbezogene Anforderungen in unterschiedlichen Gesetzen 762
- Risikomanagementsystem nach § 91 Abs. 3 bzw. §§ 76 Abs. 1, 93 Abs. 1 AktG 770
- Risikomanagementsystem nach § 91 Abs. 3 und §§ 93 Abs. 1, 76 Abs. 1 AktG 767
- Risikoperspektiven von Unternehmen 765
- Rückbeziehung und sondergesetzliche Überformung am Beispiel der Nachhaltigkeit 772
- Rücksicht auf Gemeinwohlbelange 769
- Sondervorschriften 787
- Sozial- und Umweltfaktoren 777
- Steuerung und die Überwachung von Risiken 771

- Überformung durch Sondergesetze 778
- unternehmens- und einer wirkungszentrierten Perspektive 763
- unternehmenszentriertes Risikomanagementsystem 772
- Unternehmenszentrierung als Ausgangspunkt 767
- Vorgaben an das Risikomanagementsystem wie nach der CSDDD (Corporate Sustainability Due Diligence Directive), dem LkSG, der KI-VO relevant 765
- Wirkungszentrierte Perspektive 776
- Wirkungszentrierten Risikomanagementsystem 772
- Wirkungszentrierung des gesellschaftsrechtlichen Risikomanagements 768

### **Aktionäre**

- Klimamitspracherecht 45

### **Altgesellschafter**

- Vertriebstätigkeit 25
- Vertriebsverantwortung 26
- Zurechnung von Falschauskünften Dritter 30

### **Anlageberatern und -vermittlern**

- mündliche Falschauskünfte 30

### **Anteilseigner**

- sanktionierter 71

### **Anteilseigner, sanktionierter**

- aktive Mitgliedschaftsrechte 73
- Anspruch auf Erfüllung durch Hinterlegung 94
- Ausschluss 102

### **Anteilseigner, sanktionierter**

- Ausschlussgrund 103

### **Anteilseigner, sanktionierter**

- Beteiligung an Gewinnausschüttungen 93
- Durchführung des Ausschlusses 107
- Einschaltung von Intermediären 90
- Einsichts- und Auskunftsrechte in Aktiengesellschaft 85
- Einsichts- und Auskunftsrechte in GmbH 84
- Einsichts- und Auskunftsrechte in Personengesellschaft 83
- Informationsrechte 81
- Maßnahmen der Gesellschaft gegenüber sanktionierten Anteilseignern 93
- öffentlich-rechtlich begründete Stimmverbot 97
- Rechteaussübung über Mittelsleute 90
- Stimmrechte 73
- Stimmrechtsvertretung 91
- Strukturen jenseits der formellen Anteilseignerstellung 92

- Teilnahme an der Versammlung der Anteilseigner 87
- Umgang des Abfindungsanspruchs bei Ausschluss 109
- Umgang mit Gesellschaftsanteil bei Ausschluss 107
- Unmöglichkeit der Leistung an den Sanktionierten 94
- Verbot der tatsächlichen Auszahlung zustehenden Gewinnanteile für die Dauer seiner Listung 93
- Verdrängung aus seiner Sperrminorität oder Mehrheitsbeteiligung 96
- Vermögensauskehr 99
- Versammlung der Anteilseigner 87
- Wirtschaftlicher Druck auf Unterstützer 79
- Zweckwidrigkeit einer Einzelfallentscheidung 81
- Aufsichtsrat**
  - als Organ 357
  - Amtsdauer der Aufsichtsratsmitglieder 397
  - Anfechtung der Bestellung von Aufsichtsratsmitgliedern 393
  - Anforderungen an die Aufsichtsratsmitglieder 383
  - Aufgaben 344
  - Aufsicht über durch KI vorbereitete bzw. getroffene Entscheidungen 899
  - Aufsichtsrat und Hauptversammlung 409
  - Aufsichtsrat und Verwaltungsrat 357
  - Aufsichtsratsausschüsse 377
  - Aufsichtsratsitzungen 371
  - Ausstattung und Vertretungsbefugnisse des Aufsichtsrats 368
  - Auswirkungen auf die Qualifikationsanforderungen an die Mitglieder des Aufsichtsrats bei Einsatz von KI 903
  - Befugnisse des Aufsichtsrats 398
  - Beratungsaufgabe 350
  - Beschlüsse und Beschlussanfechtung 372
  - Beschlussfassung 372
  - Beschlussmängelrecht der fehlerhaften Aufsichtsratswahl 393
  - Bestellungshindernisse 391
  - Bildung KI- bzw. Digital-Ausschuss 904
  - Büro des Aufsichtsrats 370
  - Einsatz von KI bei der Unternehmenskontrolle als Hilfsmittel des Aufsichtsrats 902
  - Einsichts- und Befragungsrechte des Aufsichtsrats im Konzern 401
  - Finanzexperten im Aufsichtsrat 385
  - Folgen für die Binnenorganisation des Aufsichtsrats und Qualifikation seiner Mitglieder bei Verwendung von Künstlicher Intelligenz 903
  - Geschlechterquote 364
  - Gesellschaftsrechtliche Grundlagen im Aktiengesetz 353
  - Größe 361
  - Größe mitbestimmender Aufsichtsrat 361
  - Größe montanmitbestimmten Aufsichtsrats 362
  - Größe nicht mitbestimmender Aufsichtsrat 363
  - Größe, Dreiteilbarkeitsgebots 362
  - heutige Verständnis der Aufgaben von Verwaltungsrat und Aufsichtsrat 357
  - Höchstzahl der Mandate 391
  - Interessenkonflikte 393
  - kapitalmarktbezogene Aufgaben 351
  - Kompetenzen im Innenverhältnis 399
  - Kompetenzen im Außenverhältnis 402
  - Kompetenzen von Vorstand und Aufsichtsrat 398
  - Kontakt mit Aktionären, Investoren und Stakeholdern 402
  - Kontakte mit Angestellten des Unternehmens 399
  - Kontrollarten 901
  - Kontrollermessen 347
  - Kontrolltiefe der KI-gestützten Entscheidung 900
  - Lead independent director 390
  - Nachhaltigkeitsaspekte 352
  - Nichtigkeit der Bestellung von Aufsichtsratsmitgliedern 393
  - Normierung der Annexkompetenzen 368
  - Offenlegung von Vergütungen 412
  - Overboarding 391
  - Pflichten und Haftung der Aufsichtsratsmitglieder 405
  - Präsenzsitzungen 371
  - Praxis 339
  - Prüfungsausschuss 381
  - Reform 339
  - Reformüberlegungen, Anforderungen an den Aufsichtsrat und seine Mitglieder 415
  - Reformüberlegungen, Aufgaben und Regelung des Aufsichtsrats 412
  - Reformüberlegungen, Aufsichtsrat und Hauptversammlung 416
  - Reformüberlegungen, Aufsichtsratsvorsitzender und Aufsichtsratsausschüsse 415
  - Reformüberlegungen, Ausstattung und Beschlussfassung 414
  - Reformüberlegungen, Zusammensetzung, Größe 412



- Regelung des Aufsichtsrats im Aktiengesetz 353
- Regelungen im Bank- und Kapitalmarktrecht 354
- Regelungen im Deutschen Corporate Governance Kodex 354
- Regelungen in den Börsenzulassungsbedingungen 354
- Repräsentation der Gesellschaft 351
- Rolle des Aufsichtsrats bei Verwendung Künstlicher Intelligenz 898
- rückwärtsgerichtete Überwachung 344
- Sachkunde der Aufsichtsratsmitglieder 383
- Einheitlichkeit schlichte und technische Entscheidungsvorgänge im Rahmen der Kontrolle 899
- Sitzungen 371
- Sorge für die Integrität der Gesellschaft 348
- Transparenz hinsichtlich aktueller Aufsichtsratsmitglieder 412
- Trennung von Geschäftsführung und Überwachung 345
- Unabhängigkeit von Aufsichtsrats- und Ausschussmitgliedern 386
- Verankerung eines Kompetenzprofils im Aktiengesetz 383
- Vertretungsbefugnis 403
- vorausschauende Überwachung 344
- Vorlagekompetenz in Hauptversammlung 410
- Vorsitzender 373
- Wahlvorschläge 411
- wirksame Bestellung der Aufsichtsratsmitglieder 391
- Zusammenarbeit des Aufsichtsrats mit dem Vorstand 346
- Zusammensetzung 364
- Zustimmungserfordernisse 404
- Aufsichtsratsausschuss**
  - Unabhängigkeit 389
- Aufsichtsratsausschüsse** 377
  - Reformüberlegungen 415
- Aufsichtsratsbüro** 370
- Aufsichtsratsmitglieder**
  - Amtsdauer 397
  - Amtsdauer 397
  - Anforderungen 383
  - Beschlussmängelrecht der fehlerhaften Aufsichtsratswahl 393
  - Bestellung 391
  - Haftung 407
  - Interessenskonflikte 393
  - Pflichten 405
  - Reformüberlegungen 415
  - Sachkunde 383
  - Unabhängigkeit 386
- Aufsichtsratssitzungen** 371
- Aufsichtsratsvorsitzender** 373
  - Reformüberlegungen 415
- Außen-GbR**
  - Nach dem MoPeG 603
  - Rechtsfähigkeit 599
  - Teilrechtsfähigkeit 601
- Berichts- und Offenlegungspflichten**
  - Art. 19a CSRD 779
  - Art. 3f SFDR 779
  - Art. 8 Taxonomie-VO 778
- Beschlussmängelklage**
  - Anfechtungsmodell 121
  - Nichtigkeitsmodell 120
  - Verhältnis zwischen Gesellschafterklage und Beschlussmängelklage 119
- Besonderer Vertreter** 537
  - Beendigung der fehlerhaften Bestellung 548
  - Ersatzansprüche im Sinne von § 147 Abs. 1 AktG 538
  - Folgen der fehlerhaften Beschlussfassung 541
  - Folgen des nichtigen verpflichtenden Hauptversammlungsbeschlusses für den besonderen Vertreter 546
  - Grundsätze der fehlerhaften Bestellung 546
  - Haftung des fehlerhaft bestellten besonderen Vertreters 549
  - keine alternative Erfassung von Organhaftungsansprüchen 545
  - Teilnichtigkeit der Bestellung 543
  - Vergütung 549
- Cash-Pooling**
  - Anspruch auf Ausgleich des Jahresfehlbetrags 918
  - Hin- und Herzahlen als ungeklärte Rechtsfragen 920
  - Novation 920
  - Ohne Verbindlichkeiten der abhängigen Gesellschaft 920
  - Verrechnung des Verlustausgleichsanspruchs innerhalb des Cash-Pools 919
- Castello di Torrecenza** 151
- CEO Activism**
  - allgemeinpolitische Äußerungen und Wahlempfehlungen 568
  - Allgemeinwohlorientierung als Geschäftsstrategie 693
  - auf Vorständen lastender Äußerungsdruck 634
  - Ausschluss aus dem Verband 588

- Ausschluss von Beteiligten bei Extremismus 579
- Äußerungen als Privatperson 560
- Äußerungen im Kernbereich der privaten Lebensgestaltung 561
- Äußerungen in der Sozialsphäre 562
- Beschränkungen politischer Stellungnahmen 570
- Corporate Social Responsibility (CSR) 689
- Definition 556
- Diskussion der Pflichtwidrigkeitsthese 649
- eingeschränkte politische Leitungsaunomie des Vorstands 712
- Einschätzbarkeit des Shareholder Value-Potenzials 653
- Einschränkungen aus der organschaftlichen Treuepflicht 562
- Einschränkungen aus der schuldrechtlichen Fremdinteressenwahrungspflicht 563
- Environmental Social Governance (ESG) 689
- extremistisches Verhalten 583
- Gefahr der Verfolgung eigener politischer Zielsetzungen 659
- Gemeinwohlbindung und Unternehmensinteresse 692
- Gesellschaftsrechtliche Judikatur und Literatur 631
- gesellschaftsrechtliche Zulässigkeit 556, 557
- Gestaltungsmöglichkeiten durch Satzungsänderung 714
- Grenzziehung zwischen unternehmenspolitischen und allgemeinpolitischen Aussagen 630
- Grundsätzliche Auseinandersetzung mit politischen Äußerungen von Unternehmen 631
- Handeln zum Wohle der Gesellschaft 573
- im gesellschaftsrechtlichen Schrifttum 575
- im verfassungsrechtlichen Schrifttum 576
- in den USA 625
- in Deutschland 625
- Informationsgrundlage für politische Äußerungen 571
- Konfliktfelder zwischen Vorstand und AG 633
- Konsentierter Allgemeinwohlbelange vs. umstrittene politische Positionen 691
- mittelbare Drittwirkung der Meinungsfreiheit und des Allgemeinen Persönlichkeitsrechts 559
- Neutralitätsklauseln 716
- Pflicht zur politischen Stellungnahme? 576
- Pflichtengefüge des deutschen Aktienrechts 557
- Pflichtwidrigkeitsthese 649
- Politische Äußerungen als Pflichtverletzungen 641
- politische Äußerungen als unternehmerische Entscheidungen 566
- politische Äußerungen mit konkretem Bezug zum Unternehmensgegenstand 567
- politische Äußerungen und die Business Judgement Rule 651
- politische Äußerungen und Vorstandshandeln im Gemeinwohlinteresse 656
- politische Betätigung von Vorstandsmitgliedern 556
- politische Handlungen unter Inanspruchnahme von Verbandsmitteln 578
- politische Positionierung abseits wirtschaftlicher Rationalität 696
- politische Stellungnahmen als Geschäftsleiter 565
- politische Verantwortung als Kehrseite sozialer Macht 697
- politische Vorgaben als Förderung langfristiger Geschäftschancen 693
- politisches Unternehmerhandeln vs. rechtsspezifische Aspekte 690
- Realphänomen 556
- Rechtfertigung durch die Meinungsfreiheit des Vorstands 662
- rechtliche Determinanten 642
- rechtlicher Rahmen 557
- Rechtsfolgen des (Nicht-) Eingreifens der Business Judgement Rule 574
- Risiko eines hohen bzw. unbegrenzten Wertverlusts 654
- Say on Political Activism 666
- Schadensersatzanspruch des Verbandes gegen den Organwahrer 557
- Senkung des Shareholder Value 649
- spezifischer Bezug zum Unternehmen 585
- statutarische Konkretisierungsmöglichkeiten: Verbandszweck und „Extremismusklauseln“ 586
- Treupflichtdogmatik 648
- Untersuchungsrelevanz 626
- Vereinbarkeit mit den organschaftlichen Pflichten zur Fremdinteressenwahrung 565
- Verknüpfung nicht wirtschaftlicher Belange mit Gewinnerzielungsinteressen 692
- vermeintlich eindeutig allgemeinpolitischen Themen 630

- Vorstand als Zoon politikon 622
- wissenschaftliche Auseinandersetzung 631
- Zusammenhang zwischen politischen Äußerungen und Unternehmenswert 650
- Zustimmungsvorbehalt des Aufsichtsrats 712
- Corporate Climate Responsibility** 555
- Corporate Digital Responsibility** 894
- Corporate Governance Kodex**
  - Lead independent director im Deutschen Corporate Governance Kodex 390
  - Regelungen um Aufsichtsrat 354
- Corporate Governance-Struktur** 555
- Corporate Political Engagement**
  - Entwicklungsphase der Materialisierung des Gesellschaftsrechts 554
- Corporate Social Responsibility (CSR)** 555
  - Siehe CEO Activism 689
- CSDDD**
  - Bereich der Finanzdienstleistungen 791
- CSDD-Richtlinie**
  - Einfluss im Gesellschaftsrecht 44
  - Klima-Transformationsplan 48
- CSRD Richtlinie Nachhaltigkeitsbericht-erstellung von Unternehmen** 47
- Deutschen Corporate Governance Kodex**
  - Reformüberlegungen 417
- Digitalisierungsrichtlinie II (Digi-RL II)** 420
- Doppelmandate**
  - ausnahmsweise Mehrfachzurechnung 827
  - ein und derselbe Organwalter 827
  - Entsendung von Organwaltern in abhängige Gesellschaften 829
  - grundsätzliche Einzelzurechnung 826
  - Kapitalgesellschaft 31 BGB 830
  - organschaftliche Mehrfachzurechnung von Handlungen bei Doppelmandaten 822
  - Verrichtung ausnahmsweise Organhandlung für mehrere Gesellschaften 827
  - wechselseitige Zurechnung gem. § 830 Abs. 1 Satz 1, Abs. 2 BGB 831
  - zusammengesetzte und mehraktige Schädigungshandlungen bei Doppelmandaten in der Zurechnungsarchitektur 830
- Due Diligence Guidances** 797
- EBA-Leitlinien für die Kreditvergabe und Überwachung** 803
- Einfrieren von Geldern** 75
- Einfriergebote**
  - Prüfungsmaßstab des EuGH 75
  - Wortlaut 76
  - Zweck 77
- eingetragene Gesellschaft bürgerlichen Rechts (eGmbH)**
  - Anwendbarkeit der Vorschriften für den Formwechsel von Personenhandelsgesellschaften 723
  - aufschiebend bedingte Verschmelzung bei fehlender Registereintragung 725
  - bis zur Registereintragung besteht jedoch ein formelles Eintragungshindernis 726
  - Minderheitenschutz durch Information 728
  - Minderheitenschutz durch Widerspruchsrecht 729
  - Umwandlung 720
  - umwandlungsfähiger Rechtsträger 721
  - Verschmelzung aufgrund Mehrheitsmacht 727
  - Verschmelzungsfähigkeit 721
  - Voreintragung als materielle Verschmelzungsvoraussetzung 723
- Ein-Klassen-Struktur im Gesellschaftsrecht**
  - Anwendungsbereich 312
  - siehe auch Zwei-Klassen-Struktur im Gesellschaftsrecht 294
- Einpersonengesellschaft** 448
- Embargo** 71
- Emissionskonsortien**
  - als Innengesellschaft 468, 477
  - Anschlussfähigkeit des Rechts der Innengesellschaft an die transnationale Vertragspraxis 483
  - auf ausländische Kapitalmärkte abzielenden Emissionen 463
  - auseinanderfallens von tatsächlicher Vertragspraxis und geltender Rechtslage auf der sachrechtlichen Ebene 475
  - Bedenken an der Vereinbarkeit der im internationalen Emissionsgeschäft üblichen vertraglichen Ausgestaltung von Konsortialverhältnissen mit den Maßgaben des deutschen Gesellschaftsrechts 464
  - Beurteilung nach Rom I-VO 469
  - Beziehung der beteiligten Banken untereinander 463
  - Diskrepanz zwischen dem law in action der grenzüberschreitenden Vertragswirklichkeit und dem law in the books der deutschen Rechtsordnung 476
  - Eigenständigkeit des Rechts der Innengesellschaft 480
  - Einordnung als Gesellschaften bürgerlichen Rechts 478
  - Gegensätze zwischen dem law in action und dem law in the books internationaler Emissionskonsortien 464

- genuin supranationalen Perspektive 469
- geschichtliche Entwicklung 465
- Konsortialverhältnis 463
- Musterverträge 466
- Musterverträge der International Capital Market Association (ICMA) 465
- sachrechtliche Implikationen 475
- Spannungsverhältnis zwischen tatsächlicher Vertragspraxis und geltender Rechtslage 469
- transnationale Vertragspraxis 465
- Typendehnung 476
- Typenmischung 476
- vertragliche Ausgestaltung 462
- wirtschaftlicher Kontext 464
- Environmental Social Governance (ESG)**
  - siehe auch CEO Activism 689
- EU Sanktionsverordnung** 71
  - Iran-Sanktionsverordnung 75
  - Russland-Sanktionsverordnung 75
  - Taliban-Sanktionsverordnung 75
- EuGH**
  - Castello di Torrescena 151
  - Definition Einfrieren von Geldern 75
  - Kornhaas-Entscheidung 155
  - Polbud-Entscheidung 152
  - Überseering- Urteil 154
- European Green Deal** 792
- Extremismus**
  - Ausschluss von Beteiligten bei Extremismus 579
- Fehlerhaft bestellte besonderer Vertreter**
  - Beendigung der fehlerhaften Bestellung 548
  - Erstattung von Versicherungsprämien 551
  - Folgen der fehlerhaften Beschlussfassung 537
  - Folgen des nichtigen verpflichtenden Hauptversammlungsbeschlusses für den besonderen Vertreter 546
  - Grundsätze der fehlerhaften Bestellung 546
  - Haftung 549
  - Haftungsgrundlagen 550
  - keine alternative Erfassung von Organhaftungsansprüchen 545
  - Pflichtwidrigkeit 550
  - Vergütung 549
- Finanzsektor**
  - Equator Principles 809
  - Funktionale Lieferketten im Aufsichtsrecht der Finanzdienstleister 799
  - Geldwäscheprävention 799
  - Green Loans 810
  - im deutschen Lieferkettensorgfaltspflichtengesetz 795
  - in den Vorentwürfen zur CSDDD 793
- Kapitalflüsse mit der Reduktion von Treibhausgasemissionen und einer Anpassung an den Klimawandel in Einklang bringen 792
- Lenkung von Kapitalflüssen in nachhaltige Wirtschaftstätigkeit 792, 810
- Lieferkettenverantwortung 791
- Lieferkettenverantwortung im funktionalen Sinn 796
- Loan Covenants 810
- Mechanismen zur Risikoeermittlung, Prävention und Abhilfe hinsichtlich der Geschäftstätigkeit des Bankkunden 811
- Nachhaltigkeitsrecht 792
- Risikomanagement im Kreditgeschäft 802
- Sorgfaltspflichten hinsichtlich der unternehmerischen Tätigkeit der Kunden 813
- Sorgfaltspflichten von Finanzdienstleistern de lege lata auf die Tätigkeit ihrer Kunden erstrecken 795
- Flexiblen Kapitalgesellschaft (FlexKapG)** 287
  - Flexibilität und Anonymität versus Mindestrechte und Publizität 309
  - Gegenüberstellung der Rechtslagen in Deutschland und Österreich 293
  - Konfliktlinien 295
  - Rechtslage in Deutschland 291
  - Rechtslage in Österreich 288
  - Risikofreudigkeit versus Risikoaversion 310
  - Statik versus Verkehrsfähigkeit 308
  - Steuerrechtliche Fragen 306
  - Typisierung und Fehlerkosten 300
  - Typisierung und Komplexitätskosten 302
  - Typisierung und Normierungskosten 299
  - Typisierung versus Privatautonomie 298
  - Vorrang versus Nachrang in der Insolvenz 307
  - Vorzüge 296
- Fondsgesellschaft**
  - Einsatz von KI 889
- Formwechsel im Europäischen Binnenmarkt** 418
  - Anspruch auf Sicherheitsleistung vor Vollzug des grenzüberschreitenden Formwechsels 444
  - Auswirkungen des grenzüberschreitenden Formwechsels auf Betriebsrenten 429
  - Barabfindung und Abstimmungsverhalten 435
  - Barabfindung und Anfechtung 439
  - Barabfindung und Austrittserklärung 441
  - Diskussionsstand der anwendbaren Vorschriften 421
  - Einpersonengesellschaft 448

- Erforderlicher Bezug zur EU bzw. zum EWR 425
- Formwechselplan 427
- Gerichtsstand 446
- Gerichtsstand der grenzüberschreitend formwechselnden Gesellschaft wird ins Ausland verlegt 443
- Gesetz für verschiedene Sonderrechtsinhaber Zustimmungserfordernisse 434
- keine allgemeine Missbrauchskontrolle im Zuzugsstaat 450
- Mehrheit der Bestätigung nach § 339 Abs. 1 UmwG 433
- Mehrheitserfordernisse bei der Beschlussfassung 430
- Missbrauchsbegriff 452
- Missbrauchskontrolle 449
- Prüfungsablauf der Missbrauchskontrolle 450
- Rentnergesellschaft 430
- Schuldnerin von Betriebsrenten ohne operatives Geschäft 458
- Schutz der (Minderheits-)Gesellschafter 430
- Schutz der Arbeitnehmer 448
- Schutz der Gläubiger 443
- Schwellenwert erreicht und keine Verknüpfung zum Zuzugsstaat 456
- Sicherheitsleistungen 444
- Situation mit Drittstaaten: Insbesondere Schweiz, Vereinigtes Königreich, Türkei, USA 426
- Umweg über anderen Mitgliedstaat 425
- Verhandlungsverfahren erst auf Aufforderung des Gerichts 455
- Verschmelzungsplan 428
- Zustimmungsbeschluss 430
- Zustimmungspflicht sämtlicher Sonderrechtsinhaber 434

#### **Formwechselplan**

- besondere Angaben 428
- Sprache 427

#### **Fortenova Group STAK Stichting**

#### **Fußballclub und Gesellschaftsrecht**

- Einfluss ihrer Geldgeber auf das sportliche Geschäft 322
- Kompetenzordnung 324
- Satzungsdurchbrechung 328
- Stimmbindungsvereinbarungen 325
- Trennung zwischen schuldrechtlicher und korporationsrechtlicher Ebene. 326
- Verbandssouveränität 335

#### **Geldwäsche**

- 4. EU-Geldwäsche-Richtlinie (GW-RL) 799
- Abhilfemaßnahmen 800

- Geldwäsche-Verordnung 799

- Prävention 800

#### **Geldwäsche-Verordnung 799**

#### **Gemeinwohlklauseln**

- notwendige Mehrheiten 54

#### **Geschäftsführer**

- Durchsetzung des „Say on Climate“ durch Unterlassungsklagen 57
- Klimaschutz als Teil der gewöhnlichen Geschäftsführungsmaßnahmen 49
- Kompetenz bei Entwicklung eines Klimatransformationsplans 49
- Legalitätspflicht für die Einhaltung dieser Nachhaltigkeitsvorgaben 49
- Pflicht, im Zusammenhang mit der Geschäftsleitung erlangte Vorteile herauszugeben 838

#### **Geschäftsleiter**

- als Treuhänder 843
- als Verwalter fremden Vermögens 843
- Aufgrund der Fremdnützigkeit ist dem Begünstigten alles zuzurechnen, was mit der Tätigkeit des Verwalters in Zusammenhang steht 845
- Aufteilung der Vorteile wegen besonders erfolgreicher Geschäftsleitertätigkeit 864
- bei no profits für Geschäftsleiter naloge Anwendung des § 88 Abs. 2 Satz 2 AktG 838
- bei no profits für Geschäftsleiter § 687 Abs. 2 Satz 1 BGB i.V.m. §§ 681 Satz 2, 667 Alt. 2 BGB 840
- bei no profits für Geschäftsleiter § 812 Abs. 1 Satz 1 Fall 2 BGB 839
- bei no profits für Geschäftsleiter allgemeiner Rückgriff auf § 667 Alt. 2 BGB 840
- bei no profits für Geschäftsleiter Herausgabepflicht bei Verletzung des gesetzlichen Wettbewerbsverbots 841
- bei no profits für Geschäftsleiter Pflicht zum Schadensersatz nach § 43 Abs. 2 GmbHG bzw. § 93 Abs. 2 Satz 1 AktG wegen Verletzung einer organschaftlichen Treuepflicht 839
- bei no profits für Geschäftsleiter punktueller Rückgriff auf § 667 Alt. 2 BGB 840
- bei no profits für Geschäftsleiter Treuepflicht 841
- bei no profits für Geschäftsleiter Umfang der Herausgabepflicht 841
- Fehlverhalten, insbesondere Verletzung der Pflicht zur Vermeidung von Interessenkonflikten 847
- Fremdnützigkeit als entscheidendes Wertungskriterium 843

- Fremdnützigkeit der Geschäftsleitertätigkeit 843
- Geltungsgrund der no-profit rule 843
- Herausgabepflicht bei Verletzung des gesetzlichen Wettbewerbsverbots 838
- Non-profitrule als Abschreckungsargumentation 851
- Noprofit rule nach § 667 Alt. 2 BGB bzw. § 716 Abs. 3 BGB 837
- organschaftlichen Treuepflicht 850
- Pflicht zur Vermeidung von Interessenkonflikten 848
- Pflicht zur Vorteilsherausgabe 847
- Pflicht, im Zusammenhang mit der Geschäftsleitung erlangte Vorteile herauszugeben 838
- rechtshistorischer und rechtsvergleichender Hintergrund der Vorteilsverteilung 845
- Sanktion für eine Pflichtverletzung 850
- Verletzung der Pflicht zur Vermeidung von Interessenkonflikten 847
- Verschuldensunabhängige Verpflichtung zur Gewinnherausgabe 852
- Vorteile jenseits ihrer Vergütung 838
- Vorteilerlangung im Zusammenhang mit einer fremdnützigen Tätigkeit 844
- Vorteilerlangung nach Ende der Amtszeit 863
- Wahrnehmung von Geschäftschancen 865
- Gesellschaft**
  - aktienrechtliches Risikomanagement 760
  - aktives „say on politics“ der Hauptversammlung 710
  - Allgemeinwohlorientierung als Geschäftsstrategie 693
  - Ausschluss des sanktionierten Anteilseigners 102
  - Beratungsaufgabe des Aufsichtsrats 350
  - Beschlusserfordernis 53
  - Beschränkung auf Äußerungen im Zusammenhang mit dem Verbandszweck 704
  - Beschränkung der Niederlassungsfreiheit 154
  - Betroffenheit der Gesellschaft bei Sanktionen 104
  - Binnenrechtsfähigkeit im Gründungsstadium 609
  - Corporate Citizenship 698
  - Doppelmandat 822
  - eingeschränkte politische Leitungsautonomie des Vorstands 712
  - eingetragene Gesellschaft bürgerlichen Rechts (eGmbH) 719
  - Entsendung von Organwaltern in abhängige Gesellschaften 829
  - Formwechsel 720
  - gemeinsamer Willen der Gesellschafter am Rechtsverkehr teilnehmen 604
  - Grundfreiheiten und Kollisionsrecht nach dem EU-Recht 157
  - Grundrechtsberechtigung der Gesellschaft gem. Art. 5 Abs. 1 Satz 1 i.V.m. Art. 19 Abs. 3 GG 703
  - Gründung in einem EU-Mitgliedstaats 153
  - Haftung mehrerer Gesellschaften für zusammengesetzte und mehraktige Schädigungshandlungen 832
  - Implikationen für die aktienrechtliche Kompetenzordnung 709
  - Implikationen von Durchgriffsthese vs. Grundrechtstypischer Gefährdungslage 705
  - Initiativkompetenz der Hauptversammlung 710
  - Institutionalisiertes Risikomanagementsystem 765
  - Klimaschutz als Teil des interessenpluralistischen Modells 50
  - Klimaschutz im Widerstreit mit dem Ziel der Profitmaximierung 54
  - Klimaschutzmaßnahmen 46
  - Klima-Transformationsplan 48
  - Legalitätspflicht für die Einhaltung dieser Nachhaltigkeitsvorgaben 49
  - Legalitätspflichten im Bereich klimabewusster Unternehmensführung 47
  - Maßnahmen der Gesellschaft gegenüber sanktionierten Anteilseignern 93
  - Mehrfachzurechnung von Handlungen bei Doppelmandaten auf 826
  - Meinungsfreiheit der Gesellschaft, als juristische Person 702
  - Meinungsfreiheit der Organmitglieder 701
  - Nachhaltigkeitsbericht 47
  - Niederlassungsfreiheit nach den Art. 49, 54 AEUV 152
  - Notkompetenz 61
  - notwendige Mehrheiten bei Gemeinwohl-Klauseln 54
  - organschaftliche Wissenszurechnung bei Doppelmandaten 834
  - passives „say on politics“ der Hauptversammlung 713
  - politische Positionierung als Ausdruck grundrechtlich geschützter Freiheit 700
  - politische Verantwortung als Kehrseite sozialer Macht 697

- politische Vorgaben als Förderung langfristiger Geschäftschancen 693
- punktuelle Durchbrechung der Satzung ohne förmliche Vertragsänderung 53
- Qualifikation im Internationalen Gesellschaftsrecht 154
- Registereintragung bzw. Aufnahme der Geschäftstätigkeit 605
- Residenzpflicht 158
- Schicksal des Abfindungsanspruchs bei Ausschluss eines Anteilseigners 109
- Schicksal des Gesellschaftsanteils bei Ausschluss eines Anteilseigners 107
- Sitzverlegung in einen anderen EU-Mitgliedstaat 153
- soft law Verhaltenspflichten für den Einsatz von KI 893
- strategische Neuausrichtung durch Klimaschutz 57
- Strukturmaßnahmen ohne Beteiligung des Sanktionierten 95
- Transformationspflicht im Klimaschutz 48
- Umwandlungsfähigkeit 720
- Unmöglichkeit der Leistung an den Sanktionierten 94
- Unternehmensintegrität 349
- verbandsrechtlichen Unterlassungsanspruchs 57
- Verrichtung ausnahmsweise Organhandlung für mehrere Gesellschaften 827
- Verschiebung der Mehrheitsverhältnisse durch Sanktionen 95
- wechselseitige Zurechnung der einzelnen Tatbeiträge bei unterschiedlichen Organwaltern 832
- wichtiger Grund in der Person des Beteiligten als allgemeine Ausschlussvoraussetzung 582
- zusammengesetzte und mehraktige Schädigungshandlungen bei Doppelmandaten in der Zurechnungsarchitektur 830

#### **Gesellschaft bürgerlichen Rechts**

- aufschiebend bedingte Verschmelzung bei fehlender Registereintragung 725
- bis zur Registereintragung besteht jedoch ein formelles Eintragungshindernis 726
- Eintragung in das Gesellschaftsregister 724
- gesetzlichen Umwandlungswirkungen erst mit Eintragung 726
- Kombination aus Mehrheitsentscheidung und Widerspruchsrecht bei Verschmelzung 733
- Voreintragung als materielle Verschmelzungsvoraussetzung 724

#### **Gesellschaft des bürgerlichen Rechts**

- Umwandlung 720

#### **Gesellschaft mit beschränkter Haftung**

- Klimamitspracherecht 44
- Kompetenzordnung bei Klimaschutzmaßnahmen 46

#### **Gesellschaft mit beschränkter Haftung (GmbH)**

- analoge Anwendung der §§ 241ff AktG 510
  - Anfechtbarkeit und Nichtigkeit von Gesellschafterbeschlüssen, § 110 HGB 504
  - Anfechtungsbefugnis und Rechtsschutzbedürfnis, § 111 HGB 513
  - Anfechtungsklage, § 113 HGB 518
  - Anfechtungsmodell bei nichtigen Beschlüssen 495
  - Dispositionsbefugnis über das grundsätzlich zwingende Prozessrecht als Teilbereich des öffentlichen Rechts 496
  - Gestaltungsfreiheit der Gesellschafter 499
  - Grenze der Gestaltungsfreiheit bei legislativer Aufgabenzuweisungskompetenz 511
  - Informationspflichten der Gesellschaft und Hinwirkungspflicht des Gerichts, § 113 Abs. 3 HGB 524
  - Klagefrist, § 112 HGB 517
  - kumulative Beschlussfeststellungsklage, § 115 HGB 533
  - Nichtigkeitsklage, § 114 HGB 532
  - Passivlegitimation der Gesellschaft, § 113 Abs. 2 HGB 522
  - privatautonome Vereinbarung der §§ 110–115 HGB 494
  - rechtliche Rahmenbedingungen des gesellschaftsvertraglichen „Opt-in“ 497
  - Streitwertfestsetzung, § 113 Abs. 5 HGB 530
  - Übertragbarkeit der §§ 110–115 HGB? 498
  - Vereinbarungen über die Unterscheidung von Anfechtbarkeit und Nichtigkeit von Beschlüssen 506
  - Vereinbarungen zur Erhebung einer Gestaltungsklage 507
  - Verfahrensleitung, § 113 Abs. 4 HGB 527
- #### **Gesellschafter**
- „wichtiger Grund“ beim Ausschluss von Gesellschaftern 582
  - Altgesellschafter und Vertriebsverantwortung 25
  - Einstandspflicht lediglich vertriebsverantwortlicher Gesellschafter bei mündlichen Falschauskünften von Anlageberatern und -vermittlern 30
  - Informationsrechte 81



- materielle Entscheidungskompetenz bei Klimafragen 45
- Mitsprache bei Klimazielen 45
- negatorische Klage zur Verteidigung des „Anteileigentums“ 64
- no-profit rule für geschäftsführende Gesellschafter 841
- Sanktionierter Anteilseigner, siehe auch Anteilseigner, sanktionierter 71
- Say on Climate 44
- Schutzzone der Mitgliedschaft 66
- siehe auch Altgesellschaften
- Vertriebsverantwortung 25
- Gesellschafter, geschäftsführender**
  - Missbrauch der Vertretungsmacht 133
  - Verfügungsbeschränkung 132
  - Verletzung der Pflicht zur ordnungsgemäßen Geschäftsführung 115
- Gesellschafterklage**
  - Anfechtungsmodell 121
  - Aufwendungsersatzanspruch des Gesellschafterklägers 141
  - Aufwendungsersatzanspruch in der Insolvenz 143
  - bei Drittansprüchen 61
  - Differenzierung bei Beschlüssen über die Nichtgeltendmachung des Anspruchs 126
  - fehlende Vergleichbarkeit mit der Hauptintervention 138
  - Folgen der Klageerhebung durch nicht geschäftsführungsbefugte Gesellschafter 129
  - Folgen für das Außenverhältnis 131
  - Folgen für das Innenverhältnis 129
  - Form der Klimaschutzklage 63
  - Gesetzgebungsgeschichte des § 715b BGB 130
  - Handlungsmöglichkeiten der Gesellschaft 134
  - in der Insolvenz 142
  - kein generelles Erfordernis eines Gesellschafterbeschlusses 117
  - keine generelle Zulässigkeit der Gesellschafterklage ohne vorherige Beschlussanfechtung 124
  - Klageerhebung durch den dazu berufenen Gesellschafter in Vertretung der Gesellschaft 135
  - Kostenrisiken 141
  - Nebenintervention 139
  - Nichtigkeitsmodell 120
  - Pflichten des Gesellschafterklägers vor Klageerhebung 116
  - Pflichtwidrigkeit des Unterlassens 115
  - Regressmöglichkeiten des Gesellschaftserklägers 141
  - Schutz des Gesellschafterklägers vor Verfügungen über den Anspruch im Außenverhältnis 131
  - Streit um Rechtsnatur 114
  - Subsidiarität 115
  - systematische Unergiebigkeit des aktienrechtlichen Klagezulassungsverfahrens 137
  - systematischer Verortung des § 715b BGB 130
  - Unzulässigkeit der Gesellschaftsklage wegen anderweitiger Rechtshängigkeit 138
  - Verhältnis zwischen Gesellschafterklage und Beschlussmängelklage 119
  - Wegen Klimaschutzmaßnahmen 60
- Gesellschafterversammlung**
  - anfechtbaren und nichtigen Beschlüssen 495
  - Durchsetzung des „Say on Climate“ durch Unterlassungsklagen 57
  - Klimamitspracherechte 57
  - nichtige Beschlüsse 495
  - Say on Climate 49
  - Teilnahme von sanktioniertem Anteilseigner 87
- Gesellschaftsrecht**
  - Actio pro socio 61
  - Corporate Climate Responsibility 555
  - Corporate Governance-Struktur 555
  - Corporate Political Engagement 555
  - Corporate Social Responsibility (CSR) 555
  - einen Anteilseigner mit einem gesetzlichen Stimmverbot belegt 96
  - Einfluss in Fußballclub 322
  - EU-Sanktionsverordnung 72
  - Extremismus 554
  - Fußballclub 322
  - Geltendmachung von (Sozial-)Ansprüchen ist keine ungewöhnliche Geschäftsführungsmaßnahme 118
  - Gesellschafterklage 112
  - Indienstnahme des Gesellschaftsrechts für politische und gesellschaftliche Zwecke 689
  - Kompetenzübertragungen in der Gesellschaft 336
  - Materialisierung 554
  - Materialisierungsphasen 554
  - Mehrfachzurechnung von Handlungen bei Doppelmandaten auf 826
  - mitgliedschaftliche Treuepflicht 98
  - no profits für Geschäftsleiter 838



- numerus clausus der Gestaltungsclagen 509
- politische Äußerungen 554
- rechtliche Rahmenbedingungen für politische Positionierungen gesellschaftsrechtlicher Organe 686
- sanktionierter Anteilseigner, siehe auch Anteilseigner, sanktionierter 71
- Satzungsdurchbrechung 322, 328
- Stimmrechte sanktionierter Anteilseigner 73
- traditionelle Rolle als neutrales Organisationsrecht 554
- Verbandssouveränität 335
- Verhältnis zwischen Gesellschafterklage und Beschlussmängelklage 119
- Vermögensauskehr 99
- Wahlrecht zwischen monistischer und dualistischer Organstruktur 359
- Zulässigkeit einer Informationsweitergabe an den sanktionierten Anteilseigner 82
- Zwei-Klassen-Struktur 294

#### **Gesellschaftsvertrag**

- Nachhaltigkeitsaspekte 55

#### **Gewinnmaximierung**

- Contra Klimaschutz 55

#### **Gewinnverwendungsbeschluss**

- Anfechtungsklage 237
- Ausfall der der Ausschüttung 203
- Ausnahme für Pattsituationen 230
- Durchsetzung des Beschlusserfordernisses und Zahlungsanspruchs 232
- Ermessensreduzierung 218
- Geltung des Vollausschüttungsgebots auch in der Verzögerungssituation 222
- Gerichtliche Festsetzung analog § 315 Abs. 3 Satz 2, 2. Halbs. BGB 213
- keine Beschränkung auf einen Anspruch auf Herbeiführung eines Gewinnverwendungsbeschlusses 223
- materielle Rechtslage 204
- Notwendigkeit 224
- Pattsituation 203, 211
- positive Beschlussfeststellungsklage 238
- Problem des Gewinnvortrags 240
- problematische Fallgestaltungen 202
- rechtliche Rahmenbedingungen 201
- technische Umsetzung 237
- übermäßige Thesaurierung 202
- unterschiedliche Entwicklungslinien bei den beiden Kapitalgesellschaften 204
- Verzögerung 204
- Verzögerungssituation 242
- Zwangsvollstreckung 239

#### **GmbH**

- Einsichts- und Auskunftsrechte 83
- wichtiger Grund in der Person des Beteiligten als allgemeine Ausschlussvoraussetzung 580

#### **GmbH-Beteiligung 287**

#### **GmbH-Recht**

- Gewinnverteilung nach § 29 Abs. 1 GmbHG 212
- Gewinnverwendungsbeschluss materielle Rechtslage 204
- Gewinnverwendungsbeschluss Meinungsstand 206
- Gewinnverwendungsbeschluss Pattsituation 212
- Gewinnverwendungsbeschluss Problematische Fallgestaltungen 202
- Gewinnverwendungsbeschluss Rahmenbedingungen 201
- Gewinnverwendungsbeschluss Verzögerungssituation 221
- Gewinnverwendungsbeschluss Verzögerungssituation 242

#### **Grenzüberschreitender Formwechsel**

- Formwechsel im Europäischen Binnenmarkt 419
- Situation mit Drittstaaten: Insbesondere Schweiz, Vereinigtes Königreich, Türkei, USA 426

#### **Guidelines for Multinational Enterprises on Responsible Business Conduct 797**

#### **Haftung**

- siehe auch Prospekthaftung 1

#### **Haftungsregime**

- bürgerlich-rechtliche Prospekthaftung 8

#### **Hannover 96 Management GmbH**

- Einfluss ihrer Geldgeber auf das sportliche Geschäft 322

#### **Hauptversammlung**

- Auskunftserteilung durch den Aufsichtsrat 409
- KI als Abstimmungstool einzelner Aktionäre 906
- KI-basierte Systeme zur Entscheidungsfindung 904
- KI-basierte Systeme zur Informationsverarbeitung 904
- mit KI generierte Berichte des Vorstands und des Aufsichtsrats 905
- Nutzung von KI in der Hauptversammlung 904
- Rolle der Hauptversammlung bei Verwendung Künstlicher Intelligenz 904
- Vorlagekompetenz des Aufsichtsrats 410

**Heinen Brauerei 674****Hochfrequenzhandel**

- Einsatz von KI 889

**ICMA Agreement****Among Manager 466****Infinus-Skandal**

- Ermittlungen der Staatsanwaltschaft 825
- Geschichte 822
- Insolvenz der Firmengruppe 825
- zivilrechtliche Nachspiel 825

**Innenrechtsfähigkeit**

- Annahme einer auf das Innenverhältnis beschränkten Rechtsfähigkeit als Systembruch im sonstigen Personen- und Gesellschaftsrechts 611
- fehlende Erkennbarkeit von Rechtsfähigkeit und dinglicher Rechtslage für Dritte 608
- fehlende Schutzbedürftigkeit der Gesellschafter 608
- innenrechtsfähige „Vor-Personengesellschaft“ 605
- nicht begründbare Abweichungen vom Kapitalgesellschaftsrecht 613
- rechtsvergleichende Isolation des MoPeG 614
- teleologische Korrektur der lex lata 616
- ungelöste Rechtsfragen des Agierens einzelner Gesellschafter im Gründungsstadium 609
- Unvereinbarkeit des Konzepts der Innenrechtsfähigkeit mit sachenrechtlichen Grundsätzen 607
- Unvereinbarkeit mit § 176 HGB 611
- Verlust der Eignung des Personengesellschaftsrechts als Auffangrechtsordnung 613

**Inside-out-Perspektive 761****Insiderhandel**

- Akzeptanz der Rechtsordnung in der Gesellschaft 752
- als Informationsuntreue zu Lasten des Emittenten (misappropriation theory) 745
- Anreize für Hinweisgeber 746
- Anreizstruktur des erlaubten Insiderhandels 747
- Anreizstrukturen 746
- Ausgestaltung der Ausnahme vom Insiderhandelsverbot 747
- digitale Klarheit des Insiderhandelsverbots (disclose or abstain) 753
- Effekte der Insiderinformation im Kurs des Wertpapiers 747
- Fairness-Gedanken 755
- fehlende Grundlagen für eine teleologische Reduktion 756

- Gefühl jedes einzelnen Marktteilnehmers 753
- gesamtgesellschaftlichen Kosten/Nutzen-Abwägung 750
- gleichberechtigten Informationszugang der Marktteilnehmer (equal access oder level playing field) und der Integrität der Finanzmärkte 746
- Grenzen ökonomischer Anreize im Recht 745
- Informationseffizienz 747
- Insider unterliegt bis zur Offenlegung durch den Emittenten oder den Insider selbst dem Handelsverbot 755
- Insiderhandelsverbot als Pendant der Aufklärungspflicht eingeführt 754
- internationale Unterschiede bei Verbot von Insiderhandel 745
- Kern des Verbots von Insiderhandel 750
- Kosten-Nutzen-Abwägung (rational choice theory) 746
- Marktmechanismen 749
- mögliche Einschränkungen des Verbotes 747
- Offenlegungspflicht nur für Emittent 754
- ökonomisches Interesse des Hinweisgebers 747
- prospect theory 753
- rational choice theory 749
- Rechtsrahmen 745
- rechtssystematische Einordnung des Insiderhandelsverbots im Vertragsrecht 754
- Risikoverteilung im Vertragsrecht 754
- Situation des potenziellen Hinweisgebers 746
- Treu und Glauben 754
- Verhaltensökonomie 752
- Verkehrsauffassung 754
- Wechselwirkung zwischen Marktmechanismen und Verhaltensökonomie (behavioral economics) 749
- Whistleblower 746

**Insolvenz**

- Absehbarkeit der Verschlechterung als Unbilligkeitshindernis 1023
- Aufwendungsersatzanspruch in der Insolvenz 143
- eingeschränkte Vorstandsverantwortung im Insolvenzverfahren 1026
- Gesellschafterklage in der Insolvenz 141
- Herabsetzung der Vorstandsvergütung in der Insolvenz 1013
- Vergütung von Sanierungsmanagern 1027
- Zuständigkeitsverteilung in der Insolvenz 147

**Internationale Emissionskonsortien**

- zwischen europäischem Kollisions- und deutschem Personengesellschaftsrecht 462

**Iran-Sanktionsverordnung** 75**Kapitaladäquanz-RL (CRD IV)** 803**Kapitalgesellschaftsrecht**

- fehlende Gewinnverwendungsbeschluss 201

**Kapitalmarkt**

- „back-end“ Spekulation 255
- Abwendung namhafter Unternehmen deutschen Ursprungs hin zum US-amerikanischen Kapitalmarkt 252
- Einsatz von KI bei Investitionsentscheidungen auf Kapitalmärkten 910
- Kapitalflüsse mit der Reduktion von Treibhausgasemissionen und einer Anpassung an den Klimawandel in Einklang bringen 792
- Nachhaltigkeitsgesetzgebung 792
- Neuausrichtung der Kapitalflüsse hin zu einer nachhaltigeren Wirtschaft 792
- Neuregelungen eines übernahmerechtlicher BGAV 259
- Übernahmemarkt als wesentlicher Bestandteil des Kapitalmarkts 250
- Übernahmemarkt und Transformationsdruck 249
- Übernahmeprozesse in Deutschland als Einfallstor 253
- übernahmerechtlicher Squeeze-out 257
- Übernahmerrichtlinie-Umsetzungsgesetz 257
- Vorschlag für neuen § 39d WpÜG 260
- wachsende Sorgen um deutschen Kapitalmarkt 252
- ZuFinG 258
- Zukunftsfähigkeit des deutschen Kapitalmarkts 252

**Kartellrecht**

- europäische Anknüpfungspunkte 676
- Rechtsprechung des EuGH zur wirtschaftlichen Einheit 677
- Regulierung des europäischen Konzerns 683
- vom Konzern zum Einheitsunternehmen? 682
- wirtschaftliche Einheit 675

**Kartellzivilprozessrecht**

- wirtschaftliche Einheit 673
- Zuständigkeit 679

**KI-Verordnung (EU) 2024/1689** 871, 892**Klimaschutz**

- Berichtspflichten in der Gesellschaft 47
- Beschlusserfordernis 53
- contra Gewinnmaximierung 55

- Durchsetzbarkeit durch Unterlassungsklagen 57
- Einzelmaßnahmen als zulässige Satzungsdurchbrechung 53
- Gesellschaftsrecht 44
- interessenpluralistisches Modell im Gesellschaftsrecht 50
- Klimastrategie außerhalb des Unternehmensgegenstands 53
- Klima-Transformationsplan 48
- materielle Entscheidungskompetenz bei Klimafragen in Gesellschaften 46
- ökonomische Rechtfertigung 56
- punktuelle Durchbrechung der Satzung ohne förmliche Vertragsänderung 53
- Sanktionen im Rahmen des Transformationsplans 49
- strategische Neuausrichtung 57
- Teil der Geschäftsführungsmaßnahmen 49
- ungewöhnliche Geschäftsführungsmaßnahme 52
- unternehmerische Tätigkeit 44
- Widerspruch zum Gesellschaftszweck 52
- Widerstreit mit dem Ziel der Profitmaximierung 54
- Zuständigkeit der Geschäftsführung einer Gesellschaft 47
- Zuständigkeit der Gesellschafterversammlung 51

**Klimaschutzklage**

- Gesellschafterklage 63

**Klima-Transformationsplan** 48

- Entscheidungskompetenz 49

**Konsortialverhältnis** 463**Konsortialverträge**

- Inhaltsbegrenzung 488
- Inhaltsermittlung 484
- Musterverträge 466
- Rechtswahlklausel 468

**Konzept „KYCC“ (Know Your Customer's Customer)** 802**Konzept der doppelten Wesentlichkeit** 761**Konzernrecht**

- „Ernstliches Einfordern“ als insolvenzrechtliches Erfordernis der Zahlungsunfähigkeit 921
- Anklage der Konzerntochter am Gerichtsstand der Mutter auf Schadensersatz wegen eines Wettbewerbsverstößes mitverklagt 674
- Anspruch auf Ausgleich des Jahresfehlbetrags 917
- Anspruch auf Ausgleich des Jahresfehlbetrags durch herrschendes Unternehmen 916

- Beherrschungsvertrag, § 291 Abs. 1 Satz 1 Var. 1 AktG 916
  - Cash-Pooling der abhängigen Gesellschaft bei positiven Saldo 920
  - Cash-Pooling-Systeme 918
  - eine Stundung des Ausgleichsanspruchs auf Verlustausgleich 923
  - Entstehung und Fälligkeit des Verlustausgleichsanspruchs 917
  - Gewinnabführungsvertrag, § 291 Abs. 1 Satz 1 Var. 2 AktG 916
  - Hinausschiebung des Verlustausgleichsanspruchs durch Stundung oder Stillhalten 925
  - Restrukturierungsplan 928
  - Spannung zwischen wirtschaftlicher Einheit und rechtlicher Selbstständigkeit der Konzerngesellschaften 674
  - Spannungen bei Cash-Pooling-Systemen und drohender Zahlungsunfähigkeit des herrschenden Unternehmens 918
  - Stillhalten und Stundung des Verlustausgleichs als gesellschafts- und konzernrechtliche Fragestellung 922
  - Umwandlung des Ausgleichsanspruchs der abhängigen Gesellschaft in ein Darlehen 923
  - Verzichts- und Vergleichsverbot als Schranke für Verfügungen über den Verlustausgleichsanspruch 926
  - Verzichts- und Vergleichsverbot als Schranke für Verfügungen über den Verlustausgleichsanspruch 926
  - Verzinsung des Verlustausgleichsanspruch gemäß §§ 353 Satz 1, 352 Abs. 1 HGB 917
  - wirtschaftliche Einheit 675
  - Zahlungsunfähigkeit des herrschenden Unternehmens 921
  - zweckorientierte Entfaltung von Novation, Hin- und Herzahlen, Stundung sowie Stillhalten 934
- Künstliche Intelligenz**
- Anforderungen an die Kontrolle und Organisationspflichten (Corporate Digital Responsibility) 891
  - Anforderungen an die Plausibilisierung der Entscheidungen 880
  - Anwendung innerhalb einer Aktiengesellschaft 870
  - Arbeitsrecht 891
  - Aufsicht über durch KI vorbereitete bzw. getroffene Entscheidungen 899
  - automatisierte Fundamentalanalyse 910
  - automatisierte Sentiment-Analysen 910
  - automatisierten Wertpapierhandel 910
  - Besonderheiten für institutionelle Aktionäre 908
  - Besonderheiten für Proxy Advisors (Stimmrechtsberater) 909
  - Corporate Digital Responsibility 894
  - Definition 874
  - Diskussionstand 872
  - eigenen Corporate Digital Responsibility-Abteilung 896
  - Einsatz bei Abschluss von Verträgen 889
  - Einsatz von KI auf der Ebene des Vorstands einer Aktiengesellschaft 876
  - Einsatz von KI bei der Unternehmenskontrolle als Hilfsmittel des Aufsichtsrats 902
  - Einsatz von KI bei Investitionsentscheidungen auf Kapitalmärkten 910
  - Einsatz von KI in der Vermögensverwaltung 889
  - Einsatz von KI in Fondsgesellschaften 889
  - Entscheidung über den Einsatz von KI als Leitungsentscheidung i. S. d. § 76 Abs. 1 AktG 877
  - Entscheidungsvorbereitung für den Vorstand bzw. nachgelagerte Führungsebenen 876
  - Folgen für die Binnenorganisation des Aufsichtsrats und Qualifikation seiner Mitglieder bei Nutzung von KI 903
  - Haftung des Vorstands bei Pflichtverletzungen 897
  - Haftungsmapstab bei Verwendung 892
  - Hochfrequenzhandel 889
  - Keine Delegation von Leitungsentscheidungen 888
  - KI als Abstimmungstool einzelner Aktionäre 906
  - KI-basierte Handelsstrategien 910
  - KI-Trading-Apps und -Tools 910
  - KI-Verordnung (EU) 2024/1689 871
  - Künstliches Entscheiden als Problem des Unternehmensrechts 874
  - Lagerwirtschaft 890
  - Mahnwesen 891
  - mit KI generierte Berichte des Vorstands und des Aufsichtsrats einer Aktiengesellschaft 905
  - Nutzung von KI in der Hauptversammlung 904
  - Pflicht zum Einsatz von KI bei komplexen Entscheidungsvorgängen mit umfangreichen Datenmengen 885
  - Plausibilitätskontrolle 880
  - Probleme der Informationsasymmetrie 910
  - Reichweite der Plausibilisierungspflicht 884

- Sorgfalts- und Kontrollanforderungen 877
- Teil der Satzung oder Geschäftsordnung 886
- Übertragung der ISON-Rechtsprechung 882
- UNCITRAL Model Law on Automated Contracting 890
- Unterschiede bei der Delegation der Informationsbeschaffung auf eine Maschine von der auf einen Menschen 878
- verbindliche Entscheidungen der KI mit Außenwirkung 888
- Verhältnis zur Compliance-Abteilung 896
- Vertragsgestaltung 889
- XAI (eXplainable Artificial intelligence) 880

#### **Lieferkette**

- Funktion des Vertrags in der Lieferkette 814
- Herausforderungen für die Vertragsgestaltung 816

- Rechtsdurchsetzung in der Lieferkette 814

#### **Lieferkettenorgfalt**

- aufsichtsbehördlichen Vollzug 814
- Auswirkungen auf Menschenrechte und die Umwelt 818
- Berührung zum Recht eines Drittstaates 819
- Einbeziehung von Bankverträgen 813
- Finanzdienstleistungen 791
- Präventionsfunktion 815
- Sorgfaltspflichten von Finanzdienstleistern de lege lata auf die Tätigkeit ihrer Kunden erstrecken 795
- vertraglicher Sanktionen 815
- vorübergehenden Aussetzung und Beendigung von Geschäftsbeziehungen 819

#### **Lieferkettenverantwortung**

- „doppelte Materialität“ des Nachhaltigkeitsrechts 805
- Auswirkungen der Tätigkeit von Geschäftspartnern der Verpflichteten auf Dritte 806
- dual approach 805
- funktionale Lieferketten im Aufsichtsrecht der Finanzdienstleister 799
- funktionaler Sinn 796
- nachhaltige Finanzierungen 809
- privatautonome Lieferkettenorgfalt 809
- Risikomanagement im Kreditgeschäft 802
- Vorgaben zur Prävention von Geldwäsche und Terrorismusfinanzierung 799

#### **Materialisierung des Gesellschaftsrechts**

- Phasen 554

#### **Minderheitsgesellschafter**

- Mitspracherechte bei Klimaschutzmaßnahmen 46

#### **Mitgesellschaftsrecht**

- elementaren Zuweisungsgehalt 66

#### **Musterverträge der International Capital Market Association (ICMA) 465**

#### **Nachhaltigkeitsgesetzgebung**

- Finanzsektor 792

#### **Nicht eingetragene Personengesellschaft 595**

#### **Niederlassungsfreiheit**

- einer Gesellschaft 151

#### **no-profit rule für Geschäftsleiter**

- analoge Anwendung kraft fremdnützigen Amtes 857
- Aufteilung der Vorteile wegen besonders erfolgreicher Geschäftsleitertätigkeit 864
- Auftrag i. S.v. § 662 BGB 856
- Ausdruck der Fremdnützigkeit 853
- Basis für Geschäftsleiter 852
- Basis im deutschen Recht 868
- Dauer der Herausgabepflicht 868
- entgeltliche Geschäftsbesorgung i. S.v. § 675 Abs. 1 BGB 856
- Gefahr eines Interessenkonflikts mit der Gesellschaft 858
- Grundlage für Herausgabepflichten 843
- Herausgabeanspruch aus § 667 Alt. 2 BGB 853
- Herausgabeanspruch aus § 716 Abs. 3 BGB 854
- Innerer Zusammenhang mit der Geschäftsleitertätigkeit 862, 865
- Kausalität der Geschäftsleitertätigkeit 861
- Kausalitätserfordernis 862
- ein Fall des § 687 Abs. 2 BGB 855
- Konturierung der Rechtsfolgen 861
- Mittel zur Abschreckung 843
- Rechtsfolgen 857
- Relevanz fehlender Finanzmittel der Gesellschaft 866
- Relevanz privater Kenntniserlangung durch den Geschäftsleiter 866
- Sanktion für Fehlverhalten 843
- Umfang der Herausgabepflicht 868
- Verhältnis zu § 88 Abs. 2 Satz 2 AktG und § 118 Abs. 1 Satz 2 HGB 859
- Vorteile primär aus der Verwalterrolle 862
- Vorteilerlangung im Zusammenhang mit einer fremdnützigen Tätigkeit 867
- Vorteilerlangung nach Ende der Amtszeit 863
- Wahrnehmung von Geschäftschancen 865
- welche Vorteile Geschäftsleiter „im Zusammenhang mit ihrer Tätigkeit“ 861

**Novation**

- § 57 Abs. 1 Satz 2 Var. 2 AktG und Drittvergleich im „weisungsfreien“ Konzernverhältnis 951
- Absicherung von Klagerechten außenstehender Gesellschafter als konkretisierende Zwecksetzung 930
- abstrakte Novation 943
- allgemeine Ausdeutung des Verzichts- und Vergleichsbegriffs 927
- als ungeklärte Rechtsfragen 920
- analoge Anwendung des § 302 Abs. 3 AktG auf den Darlehensrückzahlungsanspruch 945
- Aushöhlung auch des Vermögensschutzes bei fehlender Klagemöglichkeit 932
- Ausschluss der Durchsetzbarkeit des Verlustausgleichs durch Novation 934
- Drittvergleich statt freie Verfügbarkeit 937
- fehlende Verzichts- und Vergleichsfestigkeit im Rahmen des § 302 Abs. 3 AktG 940
- freie Verfügbarkeit als Ausgangspunkt 936
- keine Orientierung an §§ 27 Abs. 4 Satz 1 AktG, 19 Abs. 5 Satz 1 GmbHG 947
- Klagerechte der außenstehenden Gesellschafter im Rahmen des § 302 AktG 930
- konsequente Interpretation im Lichte sonstiger aktiengesetzlicher Verzichts- und Vergleichsverbote 930
- Missachtung der allgemeinen Sorgfaltsanforderungen 926
- prinzipielle Anlehnbarkeit an §§ 57 Abs. 1 Satz 3 Var. 2 AktG, 30 Abs. 1 Satz 2 Var. 2 GmbHG 949
- Reichweite des Verzichts- und Vergleichsverbots 927
- Suspendierung der Kapitalerhaltungsvorschriften als zu beseitigender Einwand 940
- Teil-Aufrechterhaltung des Drittvergleichserfordernisses im Fall der Abhängigkeit 950
- Verfahrensorientierter Vermögensschutz als Zweck von Verzichts- und Vergleichsverböten 929
- Vermögensinteressen der abhängigen Gesellschaft 929
- Vermögensschutz als Gradmesser 936
- Vermögensschutz als konsentierter Ausgangspunkt 929
- Verstoß gegen § 302 Abs. 3 AktG 926
- Verzichts- und Vergleichsverbot als äußerer Rahmen 926
- weitergehende Privilegierung durch gesetzliche Behandlung des Cash-Pooling 946
- Zulässigkeit von Hin- und Herzahlen 926

- Zulässigkeit von Novation 926
- zweckorientierte Entfaltung von Novation, Hin- und Herzahlen, Stundung sowie Stillhalten 934

**Österreich**

- flexible Kapitalgesellschaft (FlexKapG) 287

**Outside-in-Perspektive 761****Pensions-Sicherungs-Verein 453****Personengesellschaft**

- Ausschluss eines Gesellschafters 102
- Diskussionsstand der anwendbaren Vorschriften bei Formwechsel 421
- Mindestanforderungen an die Registerpublizität 420
- Möglichkeit des grenzüberschreitenden Formwechsels 420

**Personengesellschaft, nicht eingetragene**

- Rechtsfähigkeit 596
- Rechtsfähigkeit nach dem MoPeG 603

**Personengesellschaften**

- Einsichts- und Auskunftsrechte 83

**Personengesellschaftsrecht**

- Gesellschafterklage 112

**Personenhandelsgesellschaften**

- „Opt-in“ jedenfalls in die prozessualen Vorschriften der §§ 110–115 HGB nicht rechtfertigen 503
- Anfechtbarkeit und Nichtigkeit von Gesellschafterbeschlüssen, § 110 HGB 504
- Anfechtungsbefugnis und Rechtsschutzbedürfnis, § 111 HGB 513
- Anfechtungsklage, § 113 HGB 518
- Anfechtungsmodell 495
- Dispositionsbefugnis über das grundsätzlich zwingende Prozessrecht als Teilbereich des öffentlichen Rechts 496
- Gestaltungsfreiheit der Gesellschafter 499
- Grenze der Gestaltungsfreiheit bei legislativer Aufgabenzuweisungskompetenz 511
- Informationspflichten der Gesellschaft und Hinwirkungspflicht des Gerichts, § 113 Abs. 3 HGB 524
- Klagefrist, § 112 HGB 517
- kodifiziertes Beschlussmängelrecht 495
- kumulative Beschlussfeststellungsklage, § 115 HGB 533
- Nichtigkeitsklage, § 114 HGB 532
- Passivlegitimation der Gesellschaft, § 113 Abs. 2 HGB 522
- privatautonome Vereinbarung der §§ 110–115 HGB 494
- rechtliche Rahmenbedingungen des gesellschaftsvertraglichen „Opt-in“ 497

- Streitwertfestsetzung, § 113 Abs. 5 HGB 530
- Übertragbarkeit der §§ 110–115 HGB? 498
- Vereinbarungen über die Unterscheidung von Anfechtbarkeit und Nichtigkeit von Beschlüssen 506
- Vereinbarungen zur Erhebung einer Gestaltungs-klage 507
- Verfahrensleitung, § 113 Abs. 4 HGB 527
- Polbud-Entscheidung** 152
- Politisches Gesellschaftsrecht** 686
- Prinzipal-Agenten-Konflikt** 629
- privatautonome Vereinbarung der §§ 110–115 HGB** 494
- Prospekterlasser** 4
- Prospekthaftung**
  - Altfälle 17
  - Annäherungsthese des XI.Sentats 35
  - Ausgestaltung 3
  - Ausschlussfrist 9
  - mündlichen Auskünften 29
  - börsennotierte Wertpapiere 4
  - bürgerlich-rechtliche 4
  - Disput der Zivilsenate des BGH 9
  - Disput in der Literatur 12
  - Haftungsregime 8
  - Investmentvermögensanteile 4
  - Kenntnis des Prospektfehlers 9
  - Konkurrenzregeln 10
  - Konkurrenzverhältnis der Tatbestände 3, 8
  - Konsistenz eines besonderen Vertrauenserfordernisses 22
  - Konsumtion der bürgerlich-rechtlichen Haftung durch § 127 InvG a.F. und § 306 KAGB 33
  - Nebeneinander von spezialgesetzlicher und bürgerlich-rechtlicher Prospekthaftung im weiteren Sinne 17
  - Neuausrichtung 1
  - Neufälle 14
  - spezialgesetzliche 4
  - spezialgesetzlicher Regelungskatalog 31
  - Spezialitätsgrundsatz 10
  - strittige Rechtsprechung 3
  - Tatbestände 4
  - tatsächliche Prospektverwendung als eigenständiges Merkmal 21
  - Treuhandkonstellationen 27
  - uneigentliche 6
  - Unterschiede bei Alt- und Neufällen 39
  - unterschiedliche Auffassung der Zivilsenate 39
  - unterschiedliche Haftungstatbestände 38
- Verdrängungsthese zu §§ 20, 21 VermAnlG, §§ 9, 10, 14 WpPG 34
- Verdrängungswirkung des spezialgesetzlichen Regelungskatalogs 31
- Verhältnis der Tatbestände 8
- Verjährung 9
- Vermögensanlagen 4
- Verständigung der Zivilsenate 15
- Vertrauen nur gegenüber Gesellschaftern mit Einfluss auf die Vertragsanbahnung 20
- Vertrauensintensität 18
- Vertrieb durch den Altgesellschafter 25
- Vertrieb durch Dritten 27
- Zurechnung einer Vermittlertätigkeit nach § 278 BGB 19
- Prospekthaftung, bürgerlich-rechtliche** 38
  - abstraktes Vertrauen 5
  - Altgesellschafter mit Vertriebsverantwortung 13
  - Ausschluss 14
  - Ausschlussfrist 9
  - Fahrlässigkeit bei Kenntnis des Prospektfehlers 9
  - Haftung für Folgeschäden 8
  - Haftungsregime 8
  - Haftungsumfang 8
  - im engeren Sinn 4
  - Kreis der Verpflichteten 6
  - persönliches Vertrauen 5
  - Rechtsprechung für Altfälle 13
  - Rechtsprechung für Neufälle 14
  - Verdrängung durch Spezialgesetze 10
  - Vertrauen in den Prospekt selbst 5
  - Vertriebsverantwortung 13
- Prospekthaftung, spezialgesetzlich** 38
  - Ausschlussfrist 9
  - Kenntnis des Prospektfehlers 9
- Prospekthaftung, uneigentliche**
  - Aufklärungspflicht 6
  - vorvertragliches Verhältnis 6
- Prospekthaftung, Verständigung bei Altfällen**
  - Konturen der Vertriebsverantwortung 25
  - normales Verhandlungsvertrauen vs. besonderes persönliches Vertrauen 18
  - persönliches Schuldverhältnis gemäß § 311 Abs. 2 BGB als konsentierende Grundlage eines weitergehenden Anspruchs 17
  - Vertrauensintensität 18
- Prospektveranlasser** 4
- Prüfungsausschuss** 381
- Rechtsfähigkeit**
  - Annahme einer auf das Innenverhältnis beschränkten Rechtsfähigkeit als Systembruch



- im sonstigen Personen- und Gesellschaftsrechts 611
- Außen-GbR 599
- Außenrechtsfähigkeit 604
- Binnenrechtsfähigkeit im Gründungsstadium 609
- eingetragenen Verband 597
- fehlende Erkennbarkeit von Rechtsfähigkeit und dinglicher Rechtslage für Dritte 608
- fehlende Schutzbedürftigkeit der Gesellschaft 609
- gemeinsamer Willen der Gesellschafter am Rechtsverkehr teilnehmen 604
- Innenrechtsfähigkeit 606
- kaufmännischen Personenhandelsgesellschaft 598
- nicht eingetragenen Verband 598
- Rechtsfähigkeit mit Gründung unter Beschränkung der Vertretungsmacht auf Gründungsgeschäfte 618
- Rechtsvergleichende Isolation des MoPeG 614
- Registereintragung bzw. Aufnahme der Geschäftstätigkeit 605
- Teilrechtsfähigkeit 601
- Unvereinbarkeit des Konzepts der Innenrechtsfähigkeit mit sachenrechtlichen Grundsätzen 607
- Verbände, Grundlagen 596
- Vorgesellschaft 603
- Vor-Personengesellschaft 605
- Registerpublizität**
- Gesellschaftsrechtliche Modell 313
- Rentnergesellschaft 430**
- Richtlinie zur Nachhaltigkeitsberichterstattung (Corporate Sustainability Reporting Directive, CSRD) 761**
- Risikomanagement**
- aktienrechtliches Risikomanagement 760
- unternehmenszentriertes Risikomanagement 760
- Russland-Sanktionsverordnung 75**
- Sanktionen**
- Auswirkungen auf die Informationsrechte 81
- Einfrieren von Geldern 75
- Einfriergebote 76
- Einsichts- und Auskunftsrechte als Sanktionsverstoß 85
- identisches Ergebnis von Einfriergebot und Bereitstellungsverbot 81
- Sanktionierungsmotiv 77
- wirtschaftlicher Druck auf Unterstützer 79
- Zweckbestimmung 77
- Zweckwidrigkeit einer Einzelfallentscheidung 81
- Satzungsdurchbrechung 322**
- Say on Climate 44**
- Durchsetzung 57
- Say on Politics**
- Hauptversammlung 710
- Schneeballsystem**
- Infinitus-Skandal 824
- Smart sanctions 71**
- Social Media**
- Kontaktinstrumente 635
- Personalisierungskatalysatoren 636
- Societas Europaea**
- grenzüberschreitende Formwechsel einer SE in eine andere Rechtsform 424
- grenzüberschreitende Sitzverlegung 423
- grenzüberschreitender Formwechsel in die Rechtsform der SE 423
- Startup-Förderung 286**
- Startups**
- Flexiblen Kapitalgesellschaft (FlexKapG) 287
- Handlungsempfehlungen 320
- STRABAG SE 72**
- Sustainable Development Goals der UN („SDGs“) 792**
- Taliban-Sanktionsverordnung 75**
- Treuhandkonstellationen**
- Prospekthaftung 27
- TUI AG - Alexey Mordashov 72**
- Übereinkommens von Paris 792**
- Übernahmerechtlichen Beherrschungs- und/oder Gewinnabführungsvertrags (BGAV)**
- aktuelle Bewertungspraxis 274
- Auswirkungen auf Impulse durch aktivistische Aktionäre 271
- Effekte eines übernahmerechtlichen BGAV 266
- Entwicklungslinie in der Spruchpraxis 274
- Fortentwicklung aktueller Tendenzen 273
- gesetzgeberische Aktivitäten 279
- Gleichbehandlung der Zielgesellschaftsaktionäre 269
- jüngere Gesetzgebungsvorhaben ohne die erhoffte Wirkung 257
- keine Nachteile für das Gros der Minderheitsaktionäre 284
- minimalinvasive Lösung 259
- Status Quo 249
- verfassungsrechtlicher Rahmen 273
- Vorschlag Angemessenheitsvermutung 263
- Vorschlag Anwendbarkeit 266



- Vorschlag Ausübungszeitraum 262
- Vorschlag Behandlung von Nacherwerben 265
- Vorschlag Bestimmung der Ausgleichsleistung 264
- Vorschlag für neuen § 39d WpÜG 260
- Übernahmerrichtlinie-Umsetzungsgesetz 257**
- Umwandlungsgesetz**
  - Aufnahme der eGbR als umwandlungsfähiger Rechtsträger 721
  - bedingte Verschmelzung bei fehlender Registereintragung 725
  - materielle Verschmelzungsvoraussetzung 723
  - Mauracher Entwurf 730
  - Minderheitenschutz durch Information 728
  - Minderheitenschutz durch Widerspruchsrecht 729
  - Mindestquorum von  $\frac{3}{4}$  der abgegebenen Stimmen beim Verschmelzungsbeschluss 727
  - Neuregelungen für eGbR 723
  - notarielle Identitätsbescheinigung für Anmeldung der Verschmelzung (§ 16 Abs. 1 UmwG) 726
  - Verschmelzung aufgrund Mehrheitsmacht 727
  - Verschmelzungsbeschluss der GbR-Gesellschafterversammlung 727
  - Voreintragung als materielle Verschmelzungsvoraussetzung 723
  - Widerspruch nach § 39d UmwG 731
  - Widerspruchsmodell bei der Verschmelzung unter Beteiligung einer eGbR 719
- Umwandlungsgesetz**
  - umwandlungsfähiger Rechtsträger 721
- Umwandlungsrichtlinie**
  - Anfechtung gegen Wirksamkeit des Zustimmungsbeschlusses 439
  - Barabfindung 435
  - Barabfindung und Austrittserklärung 441
  - Definition des Grenzüberschreitenden Formwechsels 420
  - Diskussionen mit den Registergerichten über Verfahrensfragen 419
  - Mehrheit der Bestätigung nach § 339 Abs. 1 UmwG 433
  - Mehrheitserfordernisse bei der Beschlussfassung 430
  - nachträgliche Durchsetzung des Sicherheitsleistungsanspruchs 443
  - Personengesellschaften 420
  - Schuldnerin von Betriebsrenten ohne operatives Geschäft 458

- Schwellenwert erreicht und keine Verknüpfung zum Zuzugsstaat 456
- Status Quo 419
- Verhandlungsverfahren erst auf Aufforderung des Gerichts 455
- Vorgelagerter Gläubigerschutz 443
- Zustimmungserfordernissen beim Formwechsel einer AG/KGaA 434
- Zustimmungserfordernissen beim Formwechsel einer GmbH 434
- Zustimmungspflicht bei Vinkulierungsklauseln 434
- UN Guiding Principles on Business and Human Rights 797**
- UNCITRAL Model Law on Automated Contracting 890**
- Unternehmen**
  - Zusammenhang zwischen politischen Äußerungen und Unternehmenswert 650
- Unternehmensintegrität 349**
- Unternehmenspolitisches Engagement 554**
- Unternehmensrecht**
  - Entscheidungen durch Künstliche Intelligenz 875
  - Entscheidungen durch natürliche Personen 874
  - Künstliches Entscheiden als Problem des Unternehmensrechts 874
- Verlustausgleichsanspruch**
  - § 57 Abs. 1 Satz 2 Var. 2 AktG und Drittvergleich im „weisungsfreien“ Konzernverhältnis 951
  - Abschirmung gegen Einwirkungen von Seiten der Verwaltung der abhängigen Gesellschaft 918
  - Abschirmung gegen Einwirkungen von Seiten des herrschenden Unternehmens 917
  - Absicherung vollstreckungsrechtlicher Gläubigerrechte als weitere Konkretisierung 932
  - Absicherung von Klagerechten außenstehender Gesellschafter als konkretisierende Zwecksetzung 930
  - aktuelle Leistungsfähigkeit des herrschenden Unternehmens 921
  - allgemeine Ausdeutung des Verzichts- und Vergleichsbegriffs 927
  - analoge Anwendung des § 302 Abs. 3 AktG auf den Darlehensrückzahlungsanspruch 945
  - Ausgleich für die im Vertragskonzern außer Kraft gesetzten Kapitalerhaltungsvorschriften 919

- Aushöhlung auch des Vermögensschutzes bei fehlender Klagemöglichkeit 932
- Ausschluss der Durchsetzbarkeit des Verlustausgleichs durch Novation, Hin- und Herzahlen und Stundung 934
- Differenzierung zwischen Schuldumschaffung und Schuldneuschaffung 944
- Stundung des Ausgleichsanspruchs auf Verlustausgleich 923
- Erfüllung des Verlustausgleichsanspruchs im Wege der Aufrechnung 919
- Fehlende Verzichts- und Vergleichsfestigkeit im Rahmen des § 302 Abs. 3 AktG 940
- Gegenstück für sämtliche Weisungen und Gewinnabführungen 917
- Gesellschaftsrechtliche Sorgfaltsanforderungen als innere Schranke 957
- Herausarbeitung des zweistufigen Sortiermechanismus 935
- Hinausschiebung durch Stundung oder Stillhalten 925
- interne Bindung an § 302 Abs. 3 AktG kraft Legitimitätspflicht 957, 966
- kein Ausweichen auf eine abstrakte Novation 943
- keine Ausnahmen bei Restrukturierungsabsicht 955
- keine eingeschränkte Kontrolldichte bei konzerninternen Transaktionen 964
- keine Orientierung an §§ 27 Abs. 4 Satz 1 AktG, 19 Abs. 5 Satz 1 GmbHG 947
- Klagerechte der außenstehenden Gesellschafter im Rahmen des § 302 AktG 930
- Konsequente Interpretation im Lichte sonstiger aktiengesetzlicher Verzichts- und Vergleichsverbote 930
- Kontrolldichte 968
- Maßstab für den Umgang mit dem Verlustausgleichsanspruch 957, 966
- Missachtung der allgemeinen Sorgfaltsanforderungen 926
- Novation 920
- Novation und Hin- und Herzahlen als ungeklärte Rechtsfragen 920
- Pflichtenmaßstab innerhalb der Vorgaben des § 302 Abs. 3 AktG 959, 967
- Reichweite des Verzichts- und Vergleichsverbots 927
- Sonderbehandlung innerhalb des Konzernvertragsverhältnisses 917
- Spannungen bei Cash-Pooling-Systemen 918
- Spielraum beim Cash-Pooling 969
- Stillhalten und Stundung des Verlustausgleichs als gesellschafts- und konzernrechtliche Fragestellung 922
- Suspendierung der Kapitalerhaltungsvorschriften als zu beseitigender Einwand 940
- Teil-Aufrechterhaltung des Drittvergleichserfordernisses im Fall der Abhängigkeit 950
- Übernahme der Befriedigung von Drittgläubigern der Tochtergesellschaft 920
- Umwandlung des Ausgleichsanspruchs der abhängigen Gesellschaft in ein Darlehen 923
- Verlustausgleichsanspruch der abhängigen Gesellschaft**
  - Umwandlung in Darlehensrückzahlungsforderung 915
  - Unsicherheiten beim Vollzug des § 302 Abs. 3 AktG kein Fall des § 93 Abs. 1 Satz 2 AktG 963
  - Verantwortlichkeit auf Ebene des herrschenden Unternehmens 966
  - verfahrensorientierter Vermögensschutz als Zweck von Verzichts- und Vergleichsverböten 929
  - Vermögensinteressen der abhängigen Gesellschaft 929
  - Vermögensschutz als Gradmesser für Novation, Hin- und Herzahlen und Stundung 936
  - Vermögensschutz als konsentierter Ausgangspunkt 929
  - Verrechnung des Verlustausgleichsanspruchs innerhalb des Cash-Pools 919
  - Verstoß gegen § 302 Abs. 3 AktG 926
  - Verzichts- und Vergleichsverbot als äußerer Rahmen 926
  - Verzichts- und Vergleichsverbot als Schranke für Verfügungen über den Verlustausgleichsanspruch 926
  - Verzinsung 917
  - Weisungs- noch dem Gewinnabführungsrecht des herrschenden Unternehmens 917
  - weitergehende Privilegierung durch gesetzliche Behandlung des Cash-Pooling 946
  - Zahlungsunfähigkeit des herrschenden Unternehmens 918, 921
  - Zulässiger Verlustausgleich durch Aufrechnung des herrschenden Unternehmens 918
  - Zulässigkeit schlichten Stillhaltens 935
  - Zulässigkeit von Hin- und Herzahlen 926
  - Zulässigkeit von Novation 926
  - Zurückhaltung beim Hinausschieben zur Sanierungsvorbereitung 971

- zweckorientierte Entfaltung von Novation, Hin- und Herzahlen, Stundung sowie Stillhalten 934

### **Vermögensverwaltung**

- Einsatz von KI 889

### **Verschmelzung**

- aufgrund Mehrheitsmacht 727, 735
- Ausdehnung des Kreises der Inhaber des Widerspruchsrechts 730
- durch Aufnahme 736
- gesetzlichen Zustimmungserfordernis nach § 13 Abs. 2 UmwG 728
- Inhaber des Widerspruchsrechts bei GbR 734
- keine teleologische Reduktion bei fehlendem Haftungsrisiko 738
- Kombination aus Mehrheitsentscheidung und Widerspruchsrecht für GbR 733
- Minderheitenschutz durch Information 728
- Minderheitenschutz durch Widerspruchsrecht 729
- Verschmelzungsbeschluss 727
- Verschmelzungsprüfung (§ 39e Satz 1 UmwG) 728
- Verschmelzungsprüfungsbericht 729
- vorgelagertes Informationsmodell 728
- Widerspruch außerhalb der Gesellschafterversammlung 738
- Widerspruch nach § 39d UmwG 731
- Widerspruch und Abgrenzung zur negativen Stimmabgabe 739

### **Verschmelzungsbeschluss**

- Mindestquorum von  $\frac{3}{4}$  der abgegebenen Stimmen beim Verschmelzungsbeschluss 727
- Verschmelzungsbeschluss der GbR-Gesellschafterversammlung 727
- vorgelagertes Informationsmodell 728

### **Verschmelzungsplan**

- Vertreter, besonderer 537

### **Vertriebsverantwortung**

- Altgesellschafter 25
- Beauftragung Dritter 27
- Einstandspflicht lediglich vertriebsverantwortlicher Gesellschafter bei mündlichen Falschauskünften von Anlageberatern und -vermittlern 30
- neue Rechtsprechung 31
- Treuhandkonstellationen 27

### **Vorstand**

- Wichtiger Grund bei der Abberufung von Leitungsorganen 592
- Abmahnung statt Ausschluss 590
- Aktionärsinteressen vers. Gemeinwohl 646

- allgemeinpolitische Äußerungen und Wahlempfehlungen 568
- allgemeinpolitische Äußerungen zur Pflege der Corporate Reputation 644
- als alternative Instanz zu Politik und Medien 640
- Anforderungen an die Kontrolle und Organisationspflichten (Corporate Digital Responsibility) bei Verwendung von Künstlicher Intelligenz 891
- Anforderungen an die Plausibilisierung der Entscheidungen mit KI 880
- Auf Vorständen lastender Äußerungsdruck 634
- Ausschluss aus dem Verband 588
- Ausschluss von Beteiligten bei Extremismus 579
- Äußerungen als Privatperson 560
- Äußerungen im Kernbereich der privaten Lebensgestaltung 561
- Äußerungen in der Sozialsphäre 562
- Äußerungsdruck infolge einer Personalisierung der Vorstandskommunikation 635
- Äußerungsdruck infolge politischer Polarisierung der Bevölkerung 637
- Äußerungsdruck infolge von entsprechenden Forderungen vonseiten der Öffentlichkeit 639
- Äußerungsdruck infolge von Forderungen, Flagge zu zeigen 639
- Äußerungsdruck infolge von wirtschaftlichem Protektionismus und Nationalismus 638
- Beschränkungen politischer Stellungnahmen 570
- Billigkeitsabwägung zur Vergütungsherabsetzung 1017
- CEO Activism 556
- Corporate Citizenship 698
- Distanzierung 590
- Einfluss des Insolvenzverfahrens auf die Billigkeitsabwägung 1025
- eingeschränkte politische Leitungsautonomie des Vorstands 712
- eingeschränkte Vorstandsverantwortung im Insolvenzverfahren 1026
- Einsatz von KI auf der Ebene des Vorstands 876
- Einsatz von KI bei Abschluss von Verträgen 889
- Einschätzbarkeit des Shareholder Value-Potenzials 653
- Einschränkungen aus der organschaftlichen Treuepflicht 562

- Einschränkungen aus der schuldrechtlichen Fremdinteressenwahrungspflicht 563
- Entscheidung über den Einsatz von KI als Leitungsentscheidung i. S. d. § 76 Abs. 1 AktG 877
- erhöhte Anreize für Treupflichtverletzungen 661
- Gemeinwohlförderung 643
- Haftung des Vorstands bei Pflichtverletzungen im Rahmen der Verwendung von Künstlicher Intelligenz 897
- Haftungsmapstab bei Verwendung von KI 892
- Handeln zum Wohle der Gesellschaft 573
- Herabsetzung der Vorstandsvergütung in der Insolvenz 1013
- Informationsgrundlage für politische Äußerungen 571
- kein individueller Verursachungsbeitrag als Voraussetzung für Zurechenbarkeit 1019
- keine Delegation von Leitungsentscheidungen 888
- Konfliktfelder zwischen Vorstand und AG bei allgemeinpolitischen Äußerungen 633
- Kündigungsmöglichkeit gem. § 113 Satz 1 InsO 1026
- Legalitätspflicht 558
- Meinungsfreiheit als Organmitglied 701
- mittelbare Drittwirkung der Meinungsfreiheit und des Allgemeinen Persönlichkeitsrechts 559
- öffentliche Stellungnahmen zur Tagespolitik 556
- Pflicht zum Einsatz von KI bei komplexen Entscheidungsvorgängen mit umfangreichen Datenmengen 885
- Pflicht zur politischen Stellungnahme 576
- Pflichten nach dem Aktienrecht 558
- Pflichtengefüge des deutschen Aktienrechts 557
- Pflichtwidrigkeitsthese 649
- politische Äußerungen als Pflichtverletzungen 641
- politische Äußerungen als unternehmerische Entscheidungen 566
- politische Äußerungen mit konkretem Bezug zum Unternehmensgegenstand 567
- politische Äußerungen und die Business Judgement Rule 651
- politische Betätigung über reine Unternehmensinnenkommunikation hinausgehend 556
- politische Betätigung von Vorstandsmitgliedern 556
- politische Positionierung abseits wirtschaftlicher Rationalität 696
- politische Positionierung als Ausdruck grundrechtlich geschützter Freiheit 700
- politische Stellungnahmen als Geschäftsleiter 565
- politische Verantwortung als Kehrseite sozialer Macht 697
- politisches Unternehmerhandeln vs. rechtsspezifische Aspekte 690
- Prüfungsmaßstab: Unbilligkeit aus der Perspektive der Gesellschaft 1022
- Rechtsfolgen des (Nicht-) Eingreifens der Business Judgement Rule 574
- Schadensersatz an AK bei CEO Activism 665
- Schadensersatzanspruch des Verbandes gegen den Organwalter 557
- Sorgfalt eines ordentlichen und gewissenhaften Geschäftsführers 558
- Sorgfaltspflicht 558
- Statutarische Konkretisierungsmöglichkeiten: Verbandszweck und „Extremismusklauseln“ 586
- Trennung zwischen privaten Äußerungen und solchen in ihrer Organstellung 561
- Treuepflicht 558
- Treupflichtdogmatik 648
- Übergang der Herabsetzungskompetenz der Vergütung von Aufsichtsrat auf Insolvenzverwalter 1024
- Unbilligkeit aus der Perspektive der Gesellschaft 1022
- Unternehmenswertrelevanz politischer Äußerungen 642
- Unterscheidet sich die Delegation der Informationsbeschaffung auf eine Maschine von der auf einen Menschen 878
- Vergütung von Sanierungsmanagern 1027
- Vergütungsherabsetzung allgemein 1015
- Vergütungsherabsetzung im Kontext der Insolvenz 1024
- Vergütungsherabsetzungspflicht des Insolvenzverwalters 1025
- Verschlechterung nach bereits erfolgter Organbestellung 1020
- wichtiger Grund in der Person des Beteiligten als allgemeine Ausschlussvoraussetzung 580
- Zulässigkeit von Minusmaßnahmen 590
- Zurechenbarkeit der Verschlechterung als Kriterium in Gesamtabwägung 1017

- Zurechenbarkeit keine notwendige Voraussetzung für Herabsetzung der Vergütung 1018

#### **Wertpapierhandel**

- Nutzung von KI 910

#### **Wirtschaftliche Einheit 673**

#### **Wirtschaftssanktionen 71**

#### **Zukunftsfinanzierungsgesetz 258**

#### **Zwei-Klassen-Struktur im Gesellschaftsrecht**

- Anwendungsbereich 312
- Flexibilität und Anonymität versus Minderrechte und Publizität 309
- Formfreiheit versus Formzwang 313
- Gegenüberstellung zu Ein-Klassen-Struktur 294
- Konfliktlinien 295
- Kosten 294
- Optimierungsproblem 296
- Prinzipal-Agenten-Problem 294
- Risikofreudigkeit versus Risikoaversion 310
- Schuldrechtliches Modell 317
- Statik versus Verkehrsfähigkeit 308
- Typisierung und Fehlerkosten 300
- Typisierung und Komplexitätskosten 302
- Typisierung und Normierungskosten 299
- Typisierung versus Privatautonomie 298
- Vorrang versus Nachrang in der Insolvenz 307
- Vorzüge 296
- Wahlrecht zwischen monistischer und dualistischer Organstruktur 359

#### **Zwischendividenden**

- Art der Abschlagszahlung 991
- Ausblick 1011
- Bedürfnis nach Zwischendividenden 981
- Beschränkungen der Höhe nach 1009
- Beteiligung des Abschlussprüfers 1008
- Disziplinierung des Managements durch Auskehrung von freien Cashflows an die Aktionäre 985
- dividend puzzle 982
- echte 992

- echte und unechte 980
- Einführung in die Ökonomie von Dividenden und Zwischendividenden 981
- Einführung von Zwischendividenden 1005
- Erfordernis von Satzungsermächtigung und Hauptversammlungsbeschluss 1007
- Fristen 1009
- Haftungsausschluss 1010
- Höhe der Abschlagszahlung 992
- im deutschen und internationalen Aktienrecht 978
- internationalen Rechtsvergleich 993
- Konsequenzen für Gläubiger 986
- Mittel zur Reduktion freier Cashflows 985
- Ökonomische Funktionsweise von Dividenden 980
- Rechtshistorie 988
- Rechtslage in Belgien 998
- Rechtslage in den Niederlanden 996
- Rechtslage in der Schweiz 1001
- Rechtslage in Deutschland 987
- Rechtslage in Frankreich 997
- Rechtslage in Italien 996
- Rechtslage in Luxemburg 998
- Rechtslage in Österreich 1000
- Rechtslage in Spanien 999
- rechtspolitische Debatte 985
- rechtspolitische Implikationen 1005
- Rechtsvergleich 993
- Satzungsermächtigung nach § 59 Abs. 1 AktG 989
- sekundärrechtliche Grundlagen 994
- Signalwirkung gegenüber Investoren 985
- unechte 987
- unterjährige Dividendenausschüttungen 986
- Verfahren im Aufsichtsrat nach § 59 Abs. 3 AktG 990
- vorläufiger Abschluss nach § 59 Abs. 2 Satz 1 AktG 990
- Vorschlag für eine Neufassung von § 59 AktG 1010
- Wirtschaftswissenschaftlicher Forschungsstand 98
